# 1 **Assigning function to natural allelic variation via** 2 **dynamic modeling of gene network induction**

3

4 Magali Richard<sup>1,2,#</sup>, Florent Chuffart<sup>1</sup>, H el ene Duplus-Bottin<sup>1</sup>, Fanny Pouyet<sup>1</sup>, Martin  
5 Spichthy<sup>1</sup>, Etienne Fulcrand<sup>1</sup>, Marianne Entrevan<sup>1</sup>, Audrey Barthelaix<sup>1</sup>, Michael Springer<sup>3</sup>,  
6 Daniel Jost<sup>2,#</sup> and Ga el Yvert<sup>1,#</sup>

7

8 1) Laboratoire de Biologie et de Mod elisation de la Cellule, Ecole Normale Sup erieure de  
9 Lyon, CNRS, Universit  Lyon 1, Universit  de Lyon; 69007 Lyon; France.

10 2) Univ Grenoble Alpes, CNRS, TIMC-IMAG, F38000 Grenoble, France.

11 3) Department of Systems Biology, Harvard Medical School, Boston, MA 02115, USA.

12

13 #) corresponding authors: Experiments: [magali.richard@univ-grenoble-alpes.fr](mailto:magali.richard@univ-grenoble-alpes.fr) and  
14 [gael.yvert@ens-lyon.fr](mailto:gael.yvert@ens-lyon.fr) Modeling: [daniel.jost@univ-grenoble-alpes.fr](mailto:daniel.jost@univ-grenoble-alpes.fr) and [gael.yvert@ens-lyon.fr](mailto:gael.yvert@ens-lyon.fr)  
15 [lyon.fr](mailto:gael.yvert@ens-lyon.fr)

16

17

18 Contact Information:

19 Gael Yvert

20 Laboratory of Biology and Modeling of the Cell

21 Ecole Normale Sup erieure de Lyon, CNRS,

22 46 All e d'Italie, Lyon, F-69007, France

23 Ph: +33 4 72 72 87 17, [Gael.Yvert@ens-lyon.fr](mailto:Gael.Yvert@ens-lyon.fr)

24 KEYWORDS: Genetic variation, complex traits, association mapping, systems biology, gene  
25 regulatory network, stochastic model, yeast, galactose, network dynamics, GAL, inference,  
26 single-cell, SNP function, eQTL, personalized medicine, genotype-phenotype.

27

28 ABSTRACT

29

30 More and more natural DNA variants are being linked to physiological traits. Yet,  
31 understanding what differences they make on molecular regulations remains challenging.  
32 Important properties of gene regulatory networks can be captured by computational models. If  
33 model parameters can be 'personalized' according to the genotype, their variation may then  
34 reveal how DNA variants operate in the network. Here, we combined experiments and  
35 computations to visualize natural alleles of the yeast *GAL3* gene in a space of model  
36 parameters describing the galactose response network. Alleles altering the activation of Gal3p  
37 by galactose were discriminated from those affecting its activity (production/degradation or  
38 efficiency of the activated protein). The approach allowed us to correctly predict that a non-  
39 synonymous SNP would change the binding affinity of Gal3p with the Gal80p transcriptional  
40 repressor. Our results illustrate how personalizing gene regulatory models can be used for the  
41 mechanistic interpretation of genetic variants.

42

43

44

45

46 INTRODUCTION

47

48 In the past decade, countless DNA variants have been associated to physiological  
49 traits. A major challenge now is to understand how they operate at the molecular level. This is  
50 a difficult task because the mechanistic consequences resulting from each variant are not easy  
51 to identify. Even when the function of a gene is well documented, investigators need to  
52 determine the tissues, cells or organelles in which a mutant allele makes a biological  
53 difference, the developmental stage at which this may happen, the metabolic or regulatory  
54 network that may be involved, as well as possible molecular scenarios. A mutation may alter  
55 the regulation of transcription or mRNA splicing; the enzymatic activity of the target protein;  
56 its rate of production, maturation, or degradation; its intracellular localisation; its binding  
57 affinity to an interacting partner or the specificity of its molecular interactions. In the vast  
58 majority of cases, information from the DNA sequence alone is not sufficient to delimit the  
59 perimeter of possible implications.

60

61 Systems biology has opened new opportunities to better predict the action of DNA  
62 variants. First, 'omics' data that are gathered at various levels (DNA, transcripts, proteins,  
63 metabolites...) establish relations between target sequences and functional pathways.  
64 Information about molecular and genetic interactions, expression profiles, chromatin  
65 landscapes, post-transcriptional and post-translational regulations can be exploited to derive  
66 functional predictions of DNA variants. Various methods have been proposed to do this, such  
67 as Bayesian genetic mapping<sup>1</sup>, visualization of SNPs on relational protein networks<sup>2</sup>,  
68 prioritization based on negative selection<sup>3</sup>, or inference of miRNA:RNA binding defects<sup>4</sup>. In  
69 addition, structural data of biomolecules can also highlight functional perturbations in specific  
70 domains such as catalytic sites or interaction surfaces<sup>5,6</sup>.

71

72 Another alternative is to model the quantitative and dynamic properties of molecular  
73 reactions and to explore which feature(s) may be affected by a DNA variant. The functional  
74 consequences of mutations can then be inferred by considering their impact on specific  
75 parameters of the model. In other words, assigning function to a DNA variant may be  
76 straightforward after it is linked to parameters of a model. This perspective may also, on the  
77 long term, generate developments in personalized medicine: if a model can be *personalized*  
78 according to the patient's genotype then it can help predict disease progress or treatment  
79 outcome and therefore adapt medical care to the patient's specificities. For this to become  
80 reality, the model must be i) informative on the biological trait of interest and ii) identifiable  
81 and sufficiently constrained so that model parameters can be reliably inferred, accounting for  
82 the patient's specificities. These two requirements antagonize each other regarding the  
83 complexity of the model to be used. The former asks for completeness: the molecular control  
84 of the trait must be correctly covered by the model, describing known reactions as best as  
85 possible. The latter asks for simplicity: if too many parameters are allowed to be adjusted to  
86 the data, then the validity of the personalized model is questionable and none of the  
87 adjustments are informative. It is therefore important to determine if and how personalizing  
88 model parameters can be productive.

89

90 For a given molecular network, individuals from natural populations have different  
91 genotypes at several nodes (genes) of the network, as well as in numerous external factors that  
92 can affect the network properties. Such external factors can modify, for example, global  
93 translation efficiencies, metabolic states, or pathways that cross-talk with the network of  
94 interest. Adapting model parameters to specific individuals is challenging when so many  
95 sources of variation exist. A way to circumvent this difficulty is to study the network

96 experimentally in the context of a more reduced and focused variation. If investigators have  
97 access to nearly-isogenic individuals that differ only at specific genes of the network, they can  
98 then characterize the differences in network behaviour that result from these specific allelic  
99 differences. The numerous external factors affecting the network can then be ignored or  
100 drastically simplified in the model because they are common to all individuals. This way, the  
101 parameter space is constrained and only potentially-informative parameters are allowed to be  
102 adjusted to fit individual-specific data.

103  
104         Some model organisms such as the yeast *S. cerevisiae* offer this possibility. They can  
105 be manipulated to generate single allelic changes, which provides an ideal framework to link  
106 DNA variants to model parameters. In particular, the gene regulatory network controlling the  
107 yeast response to galactose (GAL network) is well characterized, both *in vivo* and *in silico*.  
108 This circuit controls galactose utilization by upregulating the expression of regulatory and  
109 metabolic genes in response to extracellular galactose<sup>7</sup>. Regulation is based on the  
110 transcriptional activator Gal4p, the galactose transporter Gal2p, a signal transducer Gal3p and  
111 the transcriptional inhibitor Gal80p. In addition, the galactokinase Gal1p, involved in  
112 galactose metabolism is also a coinducer of the response<sup>8</sup>. This system can display either a  
113 gradual induction (where the rate of transcription progressively increases in each cell  
114 according to the timing and intensity of the stimulus) or a probabilistic induction (where the  
115 probability of having high/low rate of transcription in each cell varies). This dual behaviour  
116 has received a lot of attention and important molecular features have been elucidated by  
117 experimental and theoretical approaches<sup>9-12</sup>. In particular, the dynamic response of a  
118 population of cells to galactose can be described by two quantities: the inducibility of the  
119 network is defined as the proportion of activated cells in the population, and the amplitude of  
120 the response refers to the expression level that is reached by induced cells. Regulatory

121 feedback loops of the network are critical to the switch-like behaviour. They were shown to  
122 feed back the dynamics of transcription bursts rather than the levels of expression<sup>13</sup>. They  
123 regulate the amplitude response by reducing noise in GAL gene expression<sup>14</sup>, they control the  
124 inducibility by fine-tuning the timing of the switch<sup>14</sup>, and they participate to the memory of  
125 previous inductions<sup>15,16</sup>. As a consequence, bimodal distributions of expression of the GAL  
126 genes can be observed in isogenic populations exposed to intermediate concentrations of  
127 inducer<sup>17-19</sup>, and this population heterogeneity can confer a growth advantage during the  
128 transition from glucose to galactose metabolism (diauxic shift)<sup>20</sup>. Interestingly, wild yeast  
129 isolates present diverse types of induction dynamics during the diauxic shift, ranging from  
130 strictly unimodal to transient bimodal distribution of expression levels<sup>21,22</sup>. This indicates that  
131 natural genetic variation can modify the network dynamics.

132

133 The *GAL3* gene plays a central role in the network. Its protein product Gal3p is  
134 activated by binding to galactose and ATP and then binds as a dimer to Gal80p dimers to  
135 release the repression on Gal4p at target promoters<sup>7</sup>. The protein is enriched in the cytoplasm  
136 prior to stimulation and in the nucleus after the stimulation, although this cyto-nuclear  
137 transfer does not account for the dynamics of activation<sup>23,24</sup>. Expression of *GAL3* is itself  
138 under Gal4p/Gal80p control (positive feedback). In addition, the sequence of *GAL3* differs  
139 between natural isolates of *S. cerevisiae* and this allelic variation was recently associated to  
140 different sensitivities of the network to galactose (Lee et al. PLoS Genetics, *in press*). There  
141 are multiple ways that a *GAL3* variant could affect the dynamics of induction: by modifying  
142 the production or degradation rates of the Gal3p protein or of its messenger RNA, by  
143 changing the affinity of Gal3p to galactose or ATP, by changing the capacity of Gal3p to  
144 dimerize, by changing the nucleocytoplasmic ratio of Gal3p molecules, or by changing the  
145 affinity of Gal3p to Gal80p. A *GAL3* variant may also affect the background expression level

146 of Gal3p prior to stimulation, which is known to be critical for network memory of prior  
147 stimulations<sup>25</sup>. Thus, it is difficult to predict the functional consequence of sequence variation  
148 in *GAL3*.

149

150       Using the yeast *GAL3* gene as a model framework, we show here that experimental  
151 acquisitions combined with network modeling is efficient to predict the effect of sequence  
152 variants. The principle of the approach is to link genetic variation to informative changes of  
153 parameter values of the model. We show that replacing natural *GAL3* alleles can be sufficient  
154 to transform a gradual response into a probabilistic activation, and the approach allowed us to  
155 distinguish between different types of *GAL3* alleles segregating in *S. cerevisiae* populations:  
156 those altering the activation of Gal3p by galactose, and those altering the strength with which  
157 activated Gal3p alleviates the transcriptional inhibition operated by Gal80p. In particular, our  
158 approach was efficient to associate a non-synonymous SNP with a change of binding affinity  
159 for Gal80p.

160



161 RESULTS  
162

163 **Natural variation in GAL3 affects the dynamics of network induction**

164 We constructed a panel of yeast strains that were all isogenic to the reference  
165 laboratory strain BY, except for *GAL3*. At this locus, each strain carried an allele that was  
166 transferred from a natural strain of the *Saccharomyces* Genome Resequencing Project<sup>26</sup>  
167 (Supplementary Fig. 1). All strains of the panel also harboured a *P<sub>GALI</sub>-GFP* reporter of  
168 network activity, where the promoter of the *GALI* gene controlled the expression of a GFP  
169 fluorescent protein destabilized by a degradation signal<sup>27,28</sup>. *GALI* is a paralogous gene of  
170 *GAL3*<sup>29</sup> and transcription at its promoter is commonly used as a proxy of GAL network  
171 activity<sup>15,20,22</sup>. Using flow cytometry, we monitored the dynamics of network activation in  
172 each strain (Fig. 1). This was done by first culturing cells for 3 hours in a medium containing  
173 2% raffinose, a sugar known to be neutral on network activity, adding galactose (0.5% final  
174 concentration), and quantifying fluorescence at multiple time points for 4 hours. Significant  
175 differences in the dynamics of activation were observed between the strains. Those  
176 harbouring the *GAL3*<sup>NCYC361</sup>, *GAL3*<sup>K11</sup>, *GAL3*<sup>BY</sup>, *GAL3*<sup>DBVPG1788</sup>, *GAL3*<sup>DBVPG1853</sup> and  
177 *GAL3*<sup>JAY291</sup> alleles displayed a gradual response, all cells of the population were induced and  
178 responded with similar rate of expression, maintaining population homogeneity (see example  
179 shown in Fig. 1a). In contrast, strains harbouring the *GAL3*<sup>Y12</sup> and *GAL3*<sup>YJM978</sup> alleles  
180 displayed a binary response, with a transient co-existence of induced (ON) and uninduced  
181 (OFF) cells in the population (example in Fig. 1b).

182 We quantified induction using two metrics: the mean level of reporter expression in  
183 activated cells (response amplitude), and the proportion of activated cells in the population  
184 (inducibility of the network). We observed that the response amplitude varied little among the  
185 strains, all of them approaching steady state with comparable kinetics (Fig. 1c). In contrast,  
186 inducibility of the network differed between strains (Fig. 1d). As expected, in strains showing

187 a gradual response, the fraction of ON cells increased significantly during the first two hours  
188 of induction, reaching full inducibility (all cells activated) by the end of the experiment. On  
189 the opposite, the strains showing a transient binary response displayed reduced inducibility  
190 over time. For instance, 21% of *GAL3*<sup>Y12</sup> cells were still not induced after 250 minutes of  
191 stimulation. These results indicate that natural genetic variation in *GAL3* is sufficient to  
192 modify the inducibility of the network and to convert a gradual response into a binary  
193 response, or vice versa.

194

### 195 **A quantitative model of inducibility over time**

196 To examine what functional properties of the *GAL3* gene could determine a gradual or  
197 a binary response, we constructed a dynamic stochastic model of the network (Fig. 2a). We  
198 based our quantitative model on the following current molecular knowledge. In absence of  
199 galactose, a homodimer of the transcription factor Gal4p is constitutively bound to upstream  
200 activation sites (UAS) of promoter regions of GAL genes. However, transcription is inactive  
201 because of the homodimeric Gal80p inhibition of Gal4p<sup>30,31</sup>. When intracellular galactose  
202 binds Gal3p, it changes conformation and associates with Gal80p dimers<sup>32</sup>, thereby releasing  
203 Gal80p from promoters and allowing Gal4p-mediated transcriptional activation. It was  
204 initially thought that activated Gal3p sequestered Gal80p in the cytoplasm, preventing it from  
205 its inhibitory role in the nucleus<sup>30</sup>. Later studies revised this view by showing that Gal3p  
206 molecules were not exclusively cytoplasmic<sup>23</sup>, that forcing Gal3p to be mostly nuclear did not  
207 alter the kinetics of induction<sup>23</sup>, and that the dynamics of nucleocytoplasmic trafficking were  
208 too slow to explain the fast induction of transcription<sup>24</sup>. This implies a direct role of Gal3p in  
209 promoting the dissociation of Gal80p from UAS. In addition, the galactokinase Gal1p (a  
210 paralog of Gal3p) can also act as a co-inducer of the regulatory circuit, presumably using  
211 similar mechanisms as Gal3p<sup>18</sup>.

212 Our model covers the mRNA and protein species of three major players of GAL  
213 network induction: GAL1, GAL3 and GAL80, as well as of the reporter gene. We considered  
214 that promoters of each GAL gene could switch between an ON state (full transcription) and  
215 an OFF state (leaky transcription) at rates that depended on the concentration of Gal80  
216 dimers, activated Gal3p dimers and activated Gal1p dimers. A detailed description of the  
217 model is given in Materials and Methods and in Supplementary Text 1. Most of the  
218 parameters of the model were fixed at values obtained from previous studies (Table S1).

219

### 220 **Stochastic simulations reproduce the two types of induction observed experimentally**

221 We first explored if our model captured the two types of responses of allele-  
222 replacement strains (*i.e.* binary and gradual). We ran stochastic simulations<sup>33</sup> that accounted  
223 for intrinsic and extrinsic sources of noise (see Supplementary Text 1). We observed that  
224 tuning the parameters related to *GAL3*, while keeping all other parameters constant, was  
225 sufficient to modify inducibility and to obtain either a gradual (Fig. 2b) or a binary (Fig. 2c)  
226 response of the network at a given concentration of galactose. In the gradual system, the  
227 simulated single-cell trajectories were all similar; in the binary system, the simulated single-  
228 cell trajectories bifurcated with a subset of cells having a stochastic lagging time before  
229 responding. The single-cell value of this lag time is directly correlated with the number of  
230 potential inducer proteins (Gal1p and Galp3p) present in the cell just before induction  
231 (Supplementary Fig. 2). This is in very good agreement with recent single-cell experiments on  
232 galactose induction<sup>25</sup>.

233 We then studied the response predicted by the model when stimulating the network  
234 with various concentrations of galactose while keeping model parameters constant  
235 (Supplementary Fig. 3). Inducibility increased with the concentration of galactose, with low  
236 concentrations causing a probabilistic induction (binary) and high concentrations a

237 deterministic one (gradual).

238

### 239 **Two parameters related to GAL3 control network behaviour**

240 A detailed analysis of the model showed that inducibility of the system was mainly  
241 controlled by the average values of promoter switching rates  $k_{on}$  and  $k_{off}$  at the time of  
242 induction (see Material and Methods, Supplementary Text 1 and Supplementary Figs. 2 and  
243 4). Rates  $k_{off}$  depend only on *GAL80* and are therefore invariant to *GAL3* allelic variation.  
244 Rates  $k_{on}$  depend on *GAL3* in two ways: via Gal3p\*, the amount of galactose-activated Gal3p,  
245 and via  $K_3$ , which corresponds to an effective concentration encompassing the dissociation  
246 constants of the Gal3p-Gal80p interaction and of Gal3p dimerization (see Supplementary  
247 Text 1).  $Gal3p^*$  is determined by the level of Gal3p and by parameter  $K_{gal}$ , which represents  
248 the typical concentration of galactose needed to efficiently activate Gal3p. While  $K_{gal}$  was  
249 identifiable, several other GAL3-related parameters, such as those controlling the level of  
250 Gal3p, were not and we grouped them in a meta-parameter,  $\rho_{Gal3}$ , which we termed the  
251 *strength* of GAL3.  $\rho_{Gal3}$  corresponds to the invert ratio between  $K_3$  and the mean  
252 concentration of Gal3p at the time of induction, which depends on the leaky transcription rate,  
253 the translation rate and the degradation rates of *GAL3* mRNA and protein product.

254

255 This formalism made the network sensitive to only two identifiable GAL3-related  
256 parameters,  $K_{gal}$  and  $\rho_{Gal3}$ . At a fixed concentration of galactose induction, high  $\rho_{Gal3}$  values  
257 correspond to high numbers of Gal3p dimers that can rapidly be activated to release Gal80  
258 repression. The model predicted that high values of  $\rho_{Gal3}$  would generate a gradual response  
259 (Supplementary Fig. 5a) because the number of potential activators was high enough in each  
260 cell to rapidly trigger the GAL1/GAL3-mediated positive feedback loop. In contrast, low  
261 values of  $\rho_{Gal3}$  would generate a binary response (Supplementary Fig. 5b) because the number

262 of activators is more stochastic, with many cells having too few initial Gal1p or Gal3p dimers  
263 to directly trigger the response. These cells need a lag time before fast activation (Fig.2b,c and  
264 Supplementary Fig. 2). The other important parameter,  $K_{gal}$ , corresponded to a threshold of  
265 galactose concentration below which induction was limited and favoured a binary response,  
266 and above which induction was efficient and favoured a gradual response (Supplementary  
267 Fig. 3c). In summary, both  $\rho_{Gal3}$  and  $K_{gal}$  values can determine whether the network adopts a  
268 gradual or a binary response at a given concentration of galactose induction.

269

### 270 **Linking *GAL3* alleles to specific parameter values**

271 In order to test the predictions of the model, we measured the transcriptional response  
272 of the  $GAL3^{BY}$ ,  $GAL3^{Y12}$  and  $GAL3^{YJM978}$  strains at different galactose concentrations (0.05%,  
273 0.1% and 0.5%). Our experimental observations confirmed that the inducibility increases with  
274 galactose concentration (Fig. 3a). We then used this experimental data to infer parameters  
275  $\rho_{Gal3}$  and  $K_{Gal}$  for each of the three strains. This was done by selecting a set of parameters  
276 that minimized a global chi2-score of deviation between the measured and predicted fractions  
277 of induced cells at different times after induction and for the different galactose  
278 concentrations (for details, see methods and Supplementary Text 1). To evaluate the  
279 usefulness of the inferred parameter values, we used the fitted model to predict the behaviour  
280 of each strain at a galactose concentration that was not used for model training (0.2%) (Fig.  
281 3b). Finally, to test model predictions, we experimentally monitored  $GAL3^{BY}$ ,  $GAL3^{Y12}$  and  
282  $GAL3^{YJM978}$  induction at 0.2% galactose. Without any additional fitting procedure, we  
283 observed that inducibility (fraction of activated cells over time) differed between strains in a  
284 way that was entirely consistent with model predictions. Thus, the differences among  
285 parameter values assigned to the different *GAL3* alleles are relevant outside the specific  
286 experimental conditions used for parameters estimation.

287

## 288 **Natural *GAL3* alleles map to distinct locations of the parameter space**

289 We sought to classify *GAL3* alleles based on the parameter values assigned to them.

290 We made experimental measurements on two additional strains (*GAL3*<sup>NCYC361</sup> and  
291 *GAL3*<sup>DBVPG1788</sup>) and we determined best-fit  $\rho_{Gal3}$  and  $K_{gal}$  values to them as for the three  
292 strains described above. This data and the corresponding fitted models are shown in  
293 Supplementary Fig. 6. Fig. 4a,b shows the obtained parameters,  $\rho_{Gal3}$  and  $K_{Gal}$ , normalized  
294 by the corresponding values of our reference strain *GAL3*<sup>BY</sup>. Different data points represent  
295 results obtained by applying the inference process to models with different GAL3-  
296 independent parameters (see Supplementary Text 1).

297 The fold change of a parameter between two different strains is indicative of the  
298 functional nature of the genetic variations between the two *GAL3* alleles. In agreement with  
299 the model predictions (Supplementary Fig. 3), we observed that more gradual strains  
300 (*GAL3*<sup>NCYC361</sup> and *GAL3*<sup>DBVPG1788</sup>) display a high GAL3 strength  $\rho_{Gal3}$  and a low ‘typical’  
301 galactose concentration  $K_{Gal}$ . Interestingly, we observed that  $\rho_{Gal3}$  and  $K_{Gal}$  can be de-  
302 correlated. In particular, although both *GAL3*<sup>YJM978</sup> and *GAL3*<sup>Y12</sup> strains were binary  
303 responders at all galactose concentrations tested, the model attributed this behaviour to  
304 different functional effects: a low sensitivity to galactose (high  $K_{gal}$ ) for the Gal3 protein  
305 originating from YJM978 and a reduced strength of the *GAL3* gene originating from Y12.  
306 Thus, the induction specificities of the strains can be attributed to distinct GAL3-related  
307 parameters.

308 To address the direct relationship between the network properties (gradual or binary  
309 response) and the GAL3-related parameters, we positioned each of the tested strains within a  
310 phenotypic landscape according to their relative  $\rho_{Gal3}$  and  $K_{Gal}$  parameters (Fig 4c).  
311 According to our model,  $\rho_{Gal3}$  and  $K_{Gal}$  parameters are sufficient to predict the behaviour

312 (gradual or binary) associated with a given *GAL3* allele at a given concentration of galactose.  
313 As an illustration of these predictions, we specifically observed the dynamics of  
314 transcriptional activation of the network for the strain *GAL3*<sup>DBVPG1788</sup> (Fig. 4d). The position  
315 of the *GAL3*<sup>DBVPG1788</sup> allele on the phenotypic landscape corresponded to a transient  
316 probabilistic activation at low concentration ([gal]=0.05%) converted into a gradual response  
317 at higher concentration ([gal]=0.1% and [gal]=0.5%).

318

### 319 **Variation in induction dynamics is consistent with variation in diauxic shift decision**

320 The physiological relevance of the GAL network regulation is to switch from the  
321 consumption of glucose (the preferred carbon source) to the consumption of galactose when  
322 glucose supply is running out. This diauxic switch is controlled not only by galactose  
323 induction but also by glucose-mediated repression. When both sugars are present, their  
324 relative concentration ratio determines whether cells activate the switch or not<sup>20,21,34</sup>. At some  
325 ratio values, only a fraction of the cells are induced, even at the steady-state. Given this dual  
326 regulation, the propensity of a strain to activate GAL metabolism can be quantified by  
327 measuring the fraction of induced cells after a prolonged period (8 hours) of simultaneous  
328 induction (by galactose) and repression (by glucose). If this measurement is repeated at a  
329 given concentration of galactose and various concentrations of glucose, a useful score can be  
330 computed (called 'decision threshold' hereafter): the concentration of glucose needed to  
331 maintain half the population of cells in the repressed (OFF) state (Fig. 5a). A high decision  
332 threshold corresponds to an early activation of GAL genes during the diauxic shift.

333

334 A previous study identified *GAL3* as an important genetic determinant for this  
335 decision: the concentration ratio at which cells turn GAL expression ON differs between  
336 strains harbouring different natural alleles of *GAL3* (Lee et al. PLoS Genetics, *in press*). We

337 asked if this variation was correlated with the variation observed on the dynamics of network  
338 induction. We chose four strains that showed different decision thresholds because of  
339 different *GAL3* alleles (Fig 5b) (Lee et al. PLoS Genetics, *in press*) and we monitored their  
340 dynamics of induction at three different concentrations of galactose (with no glucose). We  
341 then used our model to assign  $\rho_{Gal3}$  and  $K_{Gal}$  parameter values to each strain. Experimental  
342 data and model fitting are shown in Fig. 5b and Supplementary Fig. 7. We used the inferred  
343 parameter values to visualize the four strains in the parameter space where binary and gradual  
344 responses upon stimulation at  $[gal] = 0.25\%$  are delimited (Fig. 5d). Remarkably, the  
345 properties of induction dynamics in absence of glucose were fully consistent with the decision  
346 threshold during diauxic shift from glucose to galactose. Strains having a low decision  
347 threshold, such as *GAL3*<sup>YJM421</sup>, displayed a transient binary response, and strain *GAL3*<sup>BC187</sup>  
348 had a high decision threshold and responded gradually. Coordinates of strains in the  
349 parameter space indicate that  $\rho_{Gal3}$  values are highly informative on the decision threshold  
350 (Fig. 5d). Thus, mapping allelic variation to dynamic parameters of induction is also useful to  
351 understand trade-offs that are observed at steady-state.

352

### 353 **A quantitative parameter change predicts a role of H352D SNP on Gal3:Gal80 complex** 354 **formation**

355 We noticed that, at position 352 of the Gal3p protein, all natural strains harboured an  
356 aspartic acid, whereas the reference laboratory strain BY harboured a histidine. This aspartic  
357 acid was also conserved in *S. mikatae*, *S. paradoxus* and *S. uvarum* protein sequences<sup>35</sup>.  
358 Given the prevalence of this aspartic acid, we hypothesized that a single H352D amino-acid  
359 change could have consequences on Gal3p regulatory function.

360 To test this, we generated an artificial *GAL3*<sup>BY-H352D</sup> allele by introducing the H352D  
361 mutation in the *GAL3*<sup>BY</sup> strain and we monitored the dynamics of induction of the resulting



362 strain. At similar concentrations of galactose, induction was faster for the modified strain than  
363 for the original strain (compare Fig. 6a with Fig. 2a). We then used our model to make  
364 functional predictions. We fitted our model to experimental data of induction as described  
365 above for natural alleles. Induction dynamics of the modified strain were fully explained by  
366 preserving parameter  $K_{Gal}$  and increasing  $\rho_{Gal3}$  (Fig. 6b). This suggested that the H352D  
367 mutation did not affect activation of Gal3p by galactose but rather the strength of Gal3p,  
368 which summarizes six biochemical features: the basal level of *GAL3* transcription prior to  
369 induction, its translation and degradation rate, the degradation rate of its coding mRNA, its  
370 capacity to homodimerize and the affinity of activated Gal3p for Gal80p.

371 How the implicated SNP could change either the leaky transcription level prior to  
372 induction or the transcription rate during induction is difficult to imagine. In addition, the  
373 amino-acid change was not surrounded by any particular peptide motif, nor was it located at  
374 the extremity of the protein. This did not support for an effect on translation or degradation  
375 rates. Thus, the most plausible interpretation of the parameter change of the model was that  
376 the H352D modification would increase either the capacity of Gal3p\* to dimerize or the  
377 affinity of the Gal3p\* dimer for Gal80p.

378 To explore these possibilities, we analyzed the structure of the heterotetramer  
379  $[Gal3p^*]_2-[Gal80p]_2$  that was previously solved<sup>32</sup>. We made three important observations.  
380 First, His352 is located at the binding interface of the Gal3p\* dimer with the Gal80p dimer  
381 (Fig. 6c), and distant from the pocket containing galactose and ATP. Secondly, it is spatially  
382 close to the Gal80p site where the acidic domain of Gal4p is known to bind<sup>36</sup>. Finally, the  
383 Gal80p dimer exhibits a positive electrostatic surface potential in the vicinity of Gal3p-  
384 His352, suggesting that the replacement of the neutral His352 by a negatively charged  
385 aspartic acid would stabilize the Gal3p\*-Gal80p complex. Stabilization refers here to a gain in  
386 thermodynamic stability relative to the Gal4p-Gal80p complex, or in other words, to a

387 decrease of Gibbs free energy change ( $\Delta G_{\text{sub}}$ ) for the substitution of the Gal4p dimer by the  
388 Gal3p dimer as binding partner of the Gal80p dimer. A molecular dynamics simulation of the  
389 Asp352 mutant (in a model system of the Gal3p\*-Gal80 complex) indicates that two  
390 positively charged amino acids, Gal3p-Arg362 and Gal80p-Lys287, are able to form direct  
391 salt bridges with Asp352 (Fig. 6d). These attractive interactions of Asp352 with its  
392 environment are, however, expected to be partially cancelled out by repulsive interactions  
393 with the less proximate, negatively charged amino acids Gal3p-Glu363 and Gal80p-Glu348  
394 (Fig. 6d). Also, the polar solution (water + counter ions) could partially reduce the  
395 stabilization effect of the H352D mutation because residue 352 is better solvated in the  
396 Gal3p\* dimer than in the Gal3p\*-Gal80p tetramer. Thus, to quantify a possible stabilization  
397 effect of the H352D mutation, we computed the change in the Gibbs free energy difference,  
398  $\Delta\Delta G_{\text{sub}} = \Delta G_{\text{sub}}^{\text{D352}} - \Delta G_{\text{sub}}^{\text{H352}}$ , with the aid of the thermodynamic cycle depicted in Fig. 6e.  
399 The actual free energy calculations (see Methods) yielded  $\Delta\Delta G_{\text{sub}} = -2.8 \pm 0.9$  kcal/mol,  
400 which indicates that the H352D mutation indeed increases the thermodynamic stability of the  
401 Gal3p\*-Gal80p complex with respect to the Gal4p-Gal80p complex. Thus, as predicted by the  
402 dynamic model of network induction, the H352D mutation increases the cellular response by  
403 facilitating the formation of the complex.  
404

405 DISCUSSION

406

407 We experimentally monitored the induction dynamics of the yeast GAL network in the  
408 context of natural genetic variation at the *GAL3* gene. We built a stochastic model of the  
409 network and used it to link *GAL3* alleles to functional network parameters. This approach  
410 discriminated alleles that increased the strength of activated Gal3p (*e.g.* of strains NCYC361  
411 and DBVPG1788) from alleles that desensitized Gal3p to galactose activation (*e.g.* of strain  
412 YJM978). Alleles showing different glucose/galactose trade-offs at equilibrium displayed  
413 different dynamics of induction, and they were associated to different strength of activated  
414 Gal3p. Our approach also predicted a functional effect of a single non-synonymous SNP that  
415 was validated by atomistic simulations of the binding interface between Gal3p and Gal80p  
416 dimers. These results provide further details on the yeast GAL system and, perhaps more  
417 importantly, they constitute a proof-of-concept of the feasibility and usefulness of linking  
418 genetic variants to model parameters.

419

420 **Genetic variability of the yeast GAL network**

421

422 Our *in vivo* and *in silico* analysis of the induction kinetics of yeast GAL activation  
423 reveals properties of this system and how it is sensitive to genetic variation. Previously,  
424 several computational models of the network have been proposed, usually in an effort to  
425 understand the properties of the system at steady-state<sup>11,15,18</sup>. Particularly, they highlighted the  
426 important role of Gal3p, Gal1p and Gal80p-mediated feedback loops. Our *in silico* analysis  
427 suggests that the gradual or binary kinetic response is mainly controlled by the initial number  
428 of repressors (Gal80p) and inducers (Gal1p and Gal3p), the efficacy of galactose to activate  
429 the inducers and the efficiency of the activated inducers to release the effect of repressors. In

430 particular, a low mean number of inducers at the time of induction may lead to high cell-to-  
431 cell variability in their actual number. Cells with few inducers (as compared to repressors)  
432 display a lag time before responding, leading to a binary response pattern at the population  
433 level. This prediction from our model is fully consistent with recent experiments that tracked  
434 the induction of the network at the single-cell level and showed that the initial concentrations  
435 of Gal1p and Gal3p are predictive of the transient bimodal response<sup>25</sup>. We also observed that  
436 feedback loops were important to control the strength of cell-to-cell variability before  
437 induction (Gal80-mediated negative feedback) and the duration of lag times (Gal3/Gal1-  
438 mediated positive feedbacks), which agrees with the previous observation that disabling the  
439 Gal80p and Gal3p feedback loops can transform a gradual response into a binary one<sup>14</sup>. Our  
440 results on GAL3 genetic variants also complement previous genetic manipulations of the  
441 feedback loops, where their effect on bimodality was tested by modulating promoter  
442 activities<sup>14,15,18,19</sup>. Here, we showed that a non-synonymous variant affecting Gal3p:Gal80p  
443 interaction directly affects the dynamics of transient bimodality. This is a novel  
444 experimentally-based observation that is totally coherent with the conclusions of Venturelli *et*  
445 *al.* who showed computationally that steady-state bimodality of the network could rely on  
446 protein-protein binding affinities<sup>18</sup>.

447

448 We also observed that genetic variation at *GAL3* could affect its propensity to be  
449 activated by galactose/ATP binding. In particular, the *GAL3*<sup>YJM978</sup> allele was associated with  
450 increased values of the  $K_{Gal}$  parameter (more galactose needed for its activation). This allele  
451 harboured 3 non-synonymous SNPs: M179I, R312I and H352D. As shown above, H352D is  
452 found in all natural alleles that we tested and it therefore does not explain a change in  $K_{Gal}$   
453 specifically for *GAL3*<sup>YJM978</sup>. According to the structure of the Gal3p:Gal80p tetramer  
454 complexed with galactose and ATP<sup>32</sup>, the other two polymorphic sites do not map close to the

455 pocket containing the ligands. Met179 is located at the surface of the complex, distant from  
456 any binding interface and distant from the bound galactose (30 Å) and ATP (25 Å). The  
457 mutational effect of the rather conservative amino acid change (methionine to isoleucine) on  
458 the  $K_{Gal}$  parameter might therefore be negligible. In contrast, the non-conservative arginine to  
459 isoleucine mutation at site 312 could influence  $K_{Gal}$  in several ways: first, the positively  
460 charged arginine contributes favorably to the binding of the negatively charged ATP through  
461 long-range electrostatic interactions. The charge-neutral Ile312 variant lacks this favorable  
462 interaction and may have lower affinity for ATP, thereby penalizing activation by the two  
463 ligands. Second, residues Arg312 of the two Gal3p units are in direct contact with each other,  
464 and the non-conservative R312I change may affect the dimerization of Gal3p. Lavy *et al.*<sup>32</sup>  
465 reported that, in absence of galactose, Gal3p is monomeric in solution and adopts an open  
466 conformation that differs from the conformation generating the Gal3p:Gal3p dimeric interface  
467 found upon interaction with Gal80p. If the R312I modification alters Gal3p dimerization, this  
468 could modify the overall activation by galactose because these processes are coupled.

469  
470 We observed that genetic variation of the strength of activated Gal3p ( $\rho_{Gal3}$ ),  
471 estimated from the dynamic properties of network activation, was correlated with variation of  
472 the glucose/galactose trade-off at steady state. This implies that the two traits co-evolve in  
473 natural populations of *S. cerevisiae*. Given the relatively short time-scale of network  
474 induction, mild differences in the dynamics of activation alone are unlikely to cause fitness  
475 differences unless environmental galactose concentrations are highly dynamic. In contrast,  
476 variation in the sensitivity of the network to the ratio of external sugars corresponds to the  
477 triggering of an adaptive metabolic process, which is highly related to fitness even for slow  
478 environmental changes. The induction dynamics that we observed on short time-scales are

479 probably not themselves under selection, but they provide valuable information on the  
480 molecular mechanism affecting a fitness-related trait operating on longer time scales.

481

482 The H352D variant is interesting in this regard. At this position in Gal3p, a histidine  
483 residue was found in all laboratory strains (BY4741, CEN.PK, D273-10B, FL100, FY1679,  
484 JK9-3d, SEY6210, W303, X2180-1A, YPH499), while nearly all natural isolates as well as  
485 distant species possess an aspartic acid. Our results showed the importance of this aspartic  
486 acid for interaction with Gal80p, which suggests that its conservation in wild population  
487 results from purifying selection. The presence of slightly-deleterious mutations in laboratory  
488 strains is well-known. Examples from the reference strain BY/S288c include mutations in  
489 *AMNI*<sup>37</sup>, *BUL2*<sup>38</sup>, *ERC1*<sup>39</sup>, *FLO8*<sup>40</sup>, *GPA1*<sup>37</sup> and *HAPI*<sup>41</sup>. These mutations likely resulted  
490 from a release of purifying selection caused by strong population bottlenecks when  
491 propagating yeast on petri dishes. As for the genes listed above, the implication for *GAL3* is  
492 that most mechanistic studies refer to a "Wild-Type" protein that is in fact a slightly-  
493 hypomorphic allele not found in nature.

494

495 We also noted cases where the specificities of a *GAL3* allele in the context of the BY  
496 strain did not reflect the properties of the donor strain. An extreme example of this was the  
497 *GAL3*<sup>DBVPG1853</sup> allele which improved the response of the BY strain (Fig. 1d) while the  
498 DBVPG1853 strain itself did not respond at all to galactose (not shown), presumably because  
499 of genetic defects in other genes. Background-specific effects are common and should be  
500 taken into account when interpreting the functional impact of natural alleles in their original  
501 strain context<sup>42</sup>.

502

503 **Linking DNA variants to model parameters: feasibility and potential**

504

505           We developed our approach using a model system, the yeast GAL network, which was  
506 an ideal context for investigation: molecular players were well known, important network  
507 properties had been previously described, genetic engineering could be used to study the  
508 effect of a single gene in an otherwise isogenic background, and experimental measurements  
509 were relatively cheap. If network modeling had provided no added value in such a context, it  
510 would be hard to imagine how it could be useful in more complex frameworks. We report that  
511 it did: observing different dynamics experimentally was not sufficient to make functional  
512 inferences, but combining data and modeling was. The concept is therefore fruitful and it is  
513 interesting now to consider how it can be extended to other biological systems.

514

515           First, it is important to realize that inference is based on the wealth of information  
516 contained in the dynamics of activation. Evidently, studying the system at equilibrium would  
517 not be sufficient. Mapping DNA variants to model parameters is therefore promising for  
518 systems where time-course data is available.

519           Second, even in the simple context of our study, not all parameters of the model were  
520 identifiable and it was necessary to aggregate several of them into a meta-parameter ( $\rho_{Gal3}$ ).  
521 We admit that this constitutes a limit of the approach: when the H352D SNP was linked to  
522 this meta-parameter, additional assumptions were needed to infer biochemical effects. Similar  
523 difficulties will likely be encountered in other systems and the identifiability and sensitivity  
524 analysis of the model is therefore crucial to determine the nature of biological information  
525 that can be retrieved by the approach.

526           Third, our method here was to infer function and then to validate a prediction by  
527 exploring the structural data of a protein complex. Depending on the system under  
528 consideration and the data available, it may be judicious to reverse the approach: scanning

529 protein structures first in order to identify variants modifying binding affinities and then  
530 studying these variants specifically using experimental measurements and model-fitting. This  
531 way, a parameter change is first inferred from structural data and a dynamic model of the  
532 network then allows one to predict its phenotypic effect. The SAAP database<sup>6</sup>, which registers  
533 structurally-relevant variants of human proteins, may constitute a very helpful resource to do  
534 this.

535 Fourth, while we based our approach on cell population distributions, tracking the  
536 response dynamics of individual cells over time is also possible<sup>25</sup> and can provide more  
537 information on the network response. In other contexts, such methods had been very useful to  
538 infer parameters associated to individual cells<sup>43</sup>. A variant may then be associated to one  
539 parameter by a whole distribution of values, which likely carries more information than a  
540 single scalar value as presented here.

541 Fifth, additional work is now needed to extend the approach to more than one gene. At  
542 the level of an entire network, the overall genotype of the individual is a combination of  
543 alleles. The number of such combinatorial genotypes of the network segregating in natural  
544 populations can be very large and mapping this diversity to the parameter space would be  
545 very interesting. In particular, models accounting for genetic changes might predict and  
546 explain genetic interactions (epistasis) within the network. The challenge to achieve this will  
547 likely reside in the number of free parameters: if the genotype is allowed to vary at too-many  
548 genes, parameters cannot be constrained efficiently. Mapping variants one gene at a time, as  
549 we did here, and then in combination would maintain this necessary constraint while  
550 evaluating epistasis. A more difficult task would be to infer the contribution of genes that are  
551 external to the network while nonetheless affecting its behavior (*e.g.* by modifying widely  
552 transcription rates or the stability of proteins, or cross-talks with other networks). Studying  
553 these factors by our approach is only possible after they are identified and connected to the



554 network. Their identification can be obtained by genetic mapping. For example, we recently  
555 identified a locus on yeast chromosome V that affects the variability of the GAL response at  
556 transient times of activation<sup>28</sup>. Once identified, these factors must be integrated in the network  
557 model, which may be a complex task.

558

559 Network modeling is expected to help the development of personalized medicine and  
560 the fact that it is possible, in a yeast system, to *personalize* model parameters according to  
561 DNA variants is encouraging. Can the approach described here be applied to human variants?  
562 This requires overcoming several difficulties that could be avoided in our framework. First,  
563 most regulatory networks of human systems are incompletely known. Second, most of these  
564 networks comprise numerous genes, implying many model parameters and, possibly, too-  
565 many degrees of freedom for adjustments and identifiability issues. The first task is therefore  
566 a careful identifiability and sensitivity analysis of the model and, as much as possible, a  
567 reduction of its complexity. The work of Zhao *et al.*<sup>44</sup> is encouraging in this regard. The  
568 authors studied the mitochondrial outer membrane permeabilization network controlling entry  
569 in apoptosis. Their model comprised ~50 parameters and ~20 molecular species, but the  
570 network critical behaviour (bifurcation point) was sensitive to less than half of the parameters.  
571 The authors then searched for enrichment of cancer mutations in protein domains involved in  
572 molecular interactions and they used molecular dynamics simulations to estimate the affinity  
573 changes caused by these mutations. Interestingly, most mutations that were predicted to affect  
574 sensitive parameters of the model caused a significant change of affinity in the expected  
575 direction, illustrating that the model was able to highlight relevant vulnerabilities. Similarly,  
576 Nijhout *et al.*<sup>45</sup> studied a model of the folate-mediated one carbon metabolism system. They  
577 reported that human mutations that strongly perturb enzymatic activities could have little  
578 phenotypic effect if they targeted parameters that are poorly sensitive. Another type of

579 difficulties when studying human networks are experimental limitations: manipulating human  
580 cells needs more time and funds than manipulating yeast; replacing alleles of specific genes is  
581 possible via CRISPR/Cas9 editing but the large physical size of human genes as well as the  
582 functional redundancy between paralogues can be problematic; and setting up dynamic  
583 experimental acquisitions is often not straightforward. Thus, applying our approach to a  
584 minimal network in human cells compatible with genetic editing and time-series acquisitions  
585 will probably constitute an important step in the near future.

586

587

588 METHODS

589

590 **Yeast strains and plasmids.**

591 The strains used in this study are listed in Table S3. We used the strain BY4711 (GY145,  
592 isogenic to s288c) as BY reference strain. The  $P_{GALI}GFP$  reporter cassette was obtained from  
593 plasmid pGY338 previously described<sup>28</sup>. pGY338 was linearized by NheI and integrated at  
594 the *HIS3* locus of BY4711 to create strains GY1648 and GY1649, two independent  
595 transformants. To replace endogenous  $GAL3^{BY}$  allele by natural variants in GY1648 strain, we  
596 PCR amplified the *TRP1-GAL3* locus of natural wild isolates using primers 1D28(5'-  
597 AGAGGCGGTGGAGATATTCCTTATG-3') and 1D56(5'-  
598 ACGTCCGCTATAACCTTCGTTTTCTC-3'). The endogenous locus was then replaced by *in*  
599 *vivo* homologous recombination and positive transformants were selected on SD-TRP plates.  
600  $GAL3^{NCYC361}$ ,  $GAL3^{K11}$ ,  $GAL3^{Y12}$ ,  $GAL3^{DBVPG1788}$ ,  $GAL3^{DBVPG1853}$ ,  $GAL3^{YJM978}$ ,  $GAL3^{JAY291}$   
601 were PCR amplified from NCYC3451, NCYC3452, NCYC3445, NCYC3311, NCYC3313,  
602 NCYC3458 (wild isolates from the *Saccharomyces* Genome Resequencing Project, SGRP<sup>26,46</sup>)  
603 and JAY291 (Argueso *et al.*<sup>47</sup>), respectively. The strains used to characterize the effect of  
604 natural variants on galactose response were GY1648, GY1689, GY1692, GY1695, GY1698,  
605 GY1704, GY1707 and GY1713, all isogenic to S288c except for  $GAL3^{BY}$ ,  $GAL3^{NCYC361}$ ,  
606  $GAL3^{K11}$ ,  $GAL3^{Y12}$ ,  $GAL3^{DBVPG1788}$ ,  $GAL3^{DBVPG1853}$ ,  $GAL3^{YJM978}$ ,  $GAL3^{JAY291}$ , respectively.  
607 Strains genotype was verified by PCR and either high-resolution melting curves, restriction  
608 fragment length polymorphism typing or sequencing. The *TRP1-GAL3* locus from BY strain  
609 was PCR amplified with primers 1M95 (5'-  
610 tctttcattatgtgagagttaaaaaccagaaactacatcatcgaaaaaggatccAGAGGCGGTGGAGATATTCCT  
611 TATG-3') and 1M96 (5'-  
612 cgccaatacgc aaaccgctctccccgcggttgccgattcattaatgcagctgACGTCCGCTATAACCTTCGTTT

613 TCTC-3') and cloned into HpaI-linearized plasmid pALREP<sup>39</sup> by homologous recombination  
614 in yeast, generating plasmid pGY409. The mutated *GAL3*<sup>BY-H352D</sup> allele was synthesized by  
615 GeneScript and subcloned into pGY409 using MscI-BstEII restriction sites, generating  
616 plasmid pGY418. The *TRP1-GAL3*<sup>BY-H352D</sup> locus was PCR-amplified from pGY418 using  
617 primers 1D28 and 1D56 and transformed into GY1649 to create strain GY2009. Genotype  
618 was validated by PCR and sequencing. Strains of figure 5 were MPJ125-E06 (*GAL3*<sup>BY</sup>),  
619 MPJ143-H01 (*GAL3*<sup>YJM428</sup>), MPJ143-F01 (*GAL3*<sup>YJM421</sup>) and MPJ125-A07 (*GAL3*<sup>BC187</sup>) which  
620 were described in another study (Lee et al. PLoS Genetics, *in press*); they all derived from a  
621 S288c *hoΔ::GAL1pr-YFP-mTagBFP2-kanMX4; gal3Δ::hphNT1* parental strain.

622

### 623 **Galactose response measurements.**

624 Liquid cultures in synthetic medium with 2% raffinose (Yeast Nitrogen Base w/o amino acids  
625 6.7g/L, Raffinose 2%, Dropout Mix 2g/L, adjusted to pH=5.8) were inoculated with a single  
626 colony and incubated overnight, then diluted to OD<sub>600</sub> = 0.1 (synthetic medium, 2%  
627 raffinose) and grown for 3 to 6 hours. The galactose induction experiments were carried out in  
628 96-well sterile microplates using a Freedom EVO200 liquid handler (Tecan) equipped with a  
629 96-channel pipetting head (MCA), a high precision 8-channel pipetting arm (LiHa), a robotic  
630 manipulator arm (RoMa) and a MOI-6 incubator (Tecan). All robotic steps were programmed  
631 in Evoware v2.5.4.0 (Tecan). Cells were resuspended in synthetic medium with 2% raffinose  
632 and the appropriate galactose concentration (0.01, 0.1, 0.2 and 0.5%) and grown for the  
633 desired time (from 0 to 250 minutes). Cells were then washed with PBS1X, incubated for 8  
634 min in 2% paraformaldehyde (PFA) at room temperature, followed by 12 min of incubation in  
635 PBS supplemented with Glycine 0.1M at room temperature and finally resuspended in PBS.  
636 They were then analyzed on a FACSCalibur (BD Biosciences) flow cytometer to record

637 10,000 cells per sample. Each set of data is representative of the results of two independent  
638 experiments (each comprising 3 technical replicates).

639 Flow cytometry data was analysed using the *flowCore* package from Bioconductor<sup>48</sup>. Cells of  
640 homogeneous size were dynamically gated as follows: (i) removal of events with saturated  
641 signals (FSC, SSC or FL1 = 1023 or = 0), (ii) correction by subtracting the mean(FL1) at t=0  
642 to each FL1 values, (iii) computation of a density kernel of FSC, SSC values to define a  
643 perimeter of peak density containing 60% of events, (iv) cell gating using this perimeter, (v)  
644 removal of samples containing less than 3,000 cells at the end of the procedure and (vi)  
645 correction of the data according to an eventual experimental bias during cytometer  
646 acquisitions. For the twelve time-points (0, 10, 20, 30, 40, 60, 80, 100, 130, 160, 205 and 250  
647 minutes) experimental design, the time course for a given strain was acquired on different  
648 plates on the flow cytometer. In order to correct an eventual plate effect, we systematically  
649 included 24 replicates on each plate acquired on flow cytometer. We then tested the fixed  
650 effect of plates using an ANOVA. The FL1 values of each cell were subsequently corrected  
651 according to the plate offset of the ANOVA. For the six time-points (0, 30, 60, 80, 130 and  
652 210 minutes) experimental design, all the timepoints being acquired on the same experimental  
653 plate, we did not apply the normalization filter. The GFP expression values presented here in  
654 arbitrary units were the FL1 signal of the retained cells (normalized for the plate effect, if  
655 required).

656 **Analysis of flow cytometry distributions.** All statistical analysis were done using R (version  
657 3.2.4).

658 *Calculation of the response amplitude.* The response amplitude  $A$  was defined as the mean of  
659  $P_{GALI}GFP$  expression in activated cells. First, for each strain, at each time point, we  
660 determined by eye if the  $P_{GALI}GFP$  distribution was unimodal ( $f_{(X_{ALL})} = N(\mu_{ALL}, \sigma_{ALL})$ ) or  
661 bimodal ( $f_{(X_{ALL})} = f_{(X_{OFF})} + f_{(X_{ON})}$ ). If the distribution was unimodal, we calculated:

662  $A = \mu_{ALL}$ . Otherwise, bimodal distributions were considered as mixtures of two normal  
 663 distributions, such as:  $f_{(X_{ALL})} = \rho_{OFF}N(\mu_{OFF}, \sigma_{OFF}) + \rho_{ON}N(\mu_{ON}, \sigma_{ON})$ , with  $A = \mu_{ON}$ . We  
 664 used the function `mixtools::normalmixEM()` to calculate A for mixture distributions.  
 665 *Calculation of inducibility.* Inducibility was defined as the proportion of ON cells in the  
 666 population. The threshold  $t$  between OFF and ON cells was calculated as follows: i) a subset  
 667 of OFF cells (all cells acquired at  $t=0\text{min}$ ) and ON cells (activated cells belonging to  
 668 unimodal distributions, acquired at the latest time point of the experiments) was defined for  
 669 each experiments, ii) the mean and standard deviation were extracted from each OFF and ON  
 670 normal distributions using the function `mixtools::normalmixEM()`, iii) these  
 671 parameters were used to determine  $t$  such as  $\mathbb{P}(X_{ON} < t) = \mathbb{P}(X_{OFF} > t)$ , with  $X_{ON}$  the  
 672 observed fluorescence FL1 in ON\_cells and  $X_{OFF}$  the observed fluorescence FL1 in  
 673 OFF\_cells, iv) we finally calculated  $I = \frac{nb\_cells(FL1>t)}{nb\_cell(total)}$  for each time point, for each strain.

#### 674 **Stochastic modeling**

675 We model the stochastic gene expression of *GAL1*, *GAL3*, *GAL80* and of the reporter gene  
 676 (under a *GAL1* promoter). For each gene we account for the status of the promoter (ON/OFF)  
 677 and for the production and degradation of mRNAs and proteins. In addition, for the reporter  
 678 gene, we account for the maturation of the fluorescent protein. The promoter switching rate  
 679 from ON to OFF for gene  $i$  is driven by GAL80p:  $k_i^{off} = k_o^{off} \left[ \left( \frac{Gal80p}{K_{80}} \right)^2 \right]^{n_i}$  with  $n_i$  the  
 680 number of strong GAL4p binding sites in the promoter. We assume that GAL80p represses  
 681 transcription via its dimerized form (with  $K_{80}$  encompassing the dimer dissociation constant).  
 682 The promoter switching rate from OFF to ON is driven by GAL3p and Gal1p:  $k_i^{on} =$   
 683  $k_o^{on} \left[ \left( \frac{Gal1p^*}{K_1} \right)^2 + \left( \frac{Gal3p^*}{K_3} \right)^2 \right]^{n_i}$  with  $Galp^* = Galp \left( \frac{[gal]/K_{gal}}{1+[gal]/K_{gal}} \right)$  the number of activated  
 684 proteins at a given galactose concentration  $[gal]$  ( $K_{gal}$  being the galactose dissociation  
 685 constant). Here also, we assume that activated Gal3p and Gal1p are mainly found as dimers.

686  $K_1$  and  $K_3$  encompass the dimer dissociation constants as well as the affinity of activated  
687 Gal3p\* for Gal80p. For a detailed description of the model see Supplementary Text 1. Most  
688 of the parameters of the model (except  $K_1$ ,  $K_3$ ,  $K_{80}$  and  $K_{gal}$ ) were fixed based on the literature  
689 (see Table S1 in Supplementary Text 1). The model had 7 GAL3-dependent parameters:  $\alpha_3$   
690 (leaky transcription rate),  $\gamma_3$  (translation rate),  $\beta_3$  (mRNA degradation rate),  $\mu_3$  (protein  
691 degradation/dilution rate),  $\Delta\alpha_3$  (full transcription rate),  $K_3$  and  $K_{gal}$ . The phenotypic response  
692 of a strain (gradual vs binary) at a given galactose concentration mainly depends on  $K_{gal}$  and  
693 on the strength of GAL3 defined by  $\rho_{Gal3} = \alpha_3\gamma_3 / (\beta_3\mu_3K_3)$  (see main text and Supplementary  
694 Text 1). For a given set of parameters, the stochastic dynamics of galactose induction was  
695 simulated using the stochastic simulation algorithm from Gillespie<sup>33</sup>. The system was first  
696 allowed to reach steady-state at [gal]=0. At t=0, galactose is introduced and the parallel -  
697 independent - evolution of 5,000 cells is monitored during 250 minutes of real time.

698

### 699 **Parameter inference**

700 For a fixed set of GAL3-independent parameters, predictions for various values of GAL3-  
701 dependent parameters  $\rho_{Gal3}$  and  $K_{gal}$  were performed at 3 different galactose concentrations  
702 (0.05, 0.1 and 0.5%). Parameters were sampled from a 2D logarithmic-grid encompassing the  
703 region of interest. Then, for each strain, a global chi2-score between the experimental data  
704 and the corresponding model predictions integrating the 3 concentrations were minimized to  
705 infer  $\rho_{Gal3}$  and  $K_{gal}$ . Uncertainties on the parameters reflect the size of the sampling parameter  
706 grid. Parameter inference was repeated 6 times for different values of GAL3-independent  
707 parameters (see Supplementary Text 1).

708

709 **Molecular dynamics simulations** for free energy calculations were carried out as described  
710 in Supplementary Text 2 and Supplementary Fig. 8.

711

712 **Data availability.** All flow cytometry raw data files can be downloaded from

713 <http://flowrepository.org> under accession number FR-FCM-ZY6Y.

714

715

716



717 REFERENCES

- 718 1. Gaffney, D. J. *et al.* Dissecting the regulatory architecture of gene expression QTLs.  
719 *Genome Biol.* **13**, R7 (2012).
- 720 2. Bauer-Mehren, A., Furlong, L. I., Rautschka, M. & Sanz, F. From SNPs to pathways:  
721 integration of functional effect of sequence variations on models of cell signalling pathways.  
722 *BMC Bioinformatics* **10**, S6 (2009).
- 723 3. Levenstien, M. A. & Klein, R. J. Predicting functionally important SNP classes based  
724 on negative selection. *BMC Bioinformatics* **12**, 26 (2011).
- 725 4. Coronello, C. *et al.* Novel Modeling of Combinatorial miRNA Targeting Identifies  
726 SNP with Potential Role in Bone Density. *PLOS Comput. Biol.* **8**, e1002830 (2012).
- 727 5. Barenboim, M., Masso, M., Vaisman, I. I. & Jamison, D. C. Statistical geometry based  
728 prediction of nonsynonymous SNP functional effects using random forest and neuro-fuzzy  
729 classifiers. *Proteins Struct. Funct. Bioinforma.* **71**, 1930–1939 (2008).
- 730 6. Al-Numair, N. S. & Martin, A. C. The SAAP pipeline and database: tools to analyze  
731 the impact and predict the pathogenicity of mutations. *BMC Genomics* **14**, S4 (2013).
- 732 7. Sellick, C. A., Campbell, R. N. & Reece, R. J. Galactose metabolism in yeast-structure  
733 and regulation of the leloir pathway enzymes and the genes encoding them. *Int. Rev. Cell*  
734 *Mol. Biol.* **269**, 111–150 (2008).
- 735 8. Bhat, P. J. & Hopper, J. E. Overproduction of the GAL1 or GAL3 protein causes  
736 galactose-independent activation of the GAL4 protein: evidence for a new model of induction  
737 for the yeast GAL/MEL regulon. *Mol. Cell. Biol.* **12**, 2701–2707 (1992).
- 738 9. Hawkins, K. M. & Smolke, C. D. The Regulatory Roles of the Galactose Permease  
739 and Kinase in the Induction Response of the GAL Network in *Saccharomyces cerevisiae*. *J.*  
740 *Biol. Chem.* **281**, 13485–13492 (2006).
- 741 10. Biggar, S. R. & Crabtree, G. R. Cell signaling can direct either binary or graded  
742 transcriptional responses. *EMBO J.* **20**, 3167–3176 (2001).
- 743 11. Apostu, R. & Mackey, M. C. Mathematical model of GAL regulon dynamics in  
744 *Saccharomyces cerevisiae*. *J Theor Biol* **293**, 219–35 (2012).
- 745 12. Song, C. *et al.* Estimating the stochastic bifurcation structure of cellular networks.  
746 *PLoS Comput Biol* **6**, e1000699 (2010).
- 747 13. Hsu, C. *et al.* Stochastic signalling rewires the interaction map of a multiple feedback  
748 network during yeast evolution. *Nat. Commun.* **3**, 682 (2012).
- 749 14. Ramsey, S. A. *et al.* Dual feedback loops in the GAL regulon suppress cellular  
750 heterogeneity in yeast. *Nat Genet* **38**, 1082–7 (2006).
- 751 15. Acar, M., Becskei, A. & van Oudenaarden, A. Enhancement of cellular memory by  
752 reducing stochastic transitions. *Nature* **435**, 228–32 (2005).
- 753 16. Kundu, S. & Peterson, C. L. Dominant Role for Signal Transduction in the  
754 Transcriptional Memory of Yeast GAL Genes. *Mol. Cell. Biol.* **30**, 2330–2340 (2010).
- 755 17. Becskei, A., Seraphin, B. & Serrano, L. Positive feedback in eukaryotic gene  
756 networks: cell differentiation by graded to binary response conversion. *Embo J* **20**, 2528–35  
757 (2001).
- 758 18. Venturelli, O. S., El-Samad, H. & Murray, R. M. Synergistic dual positive feedback  
759 loops established by molecular sequestration generate robust bimodal response. *Proc. Natl.*  
760 *Acad. Sci.* **109**, E3324–E3333 (2012).
- 761 19. Peng, W., Liu, P., Xue, Y. & Acar, M. Evolution of gene network activity by tuning  
762 the strength of negative-feedback regulation. *Nat. Commun.* **6**, 6226 (2015).
- 763 20. Venturelli, O. S., Zuleta, I., Murray, R. M. & El-Samad, H. Population Diversification  
764 in a Yeast Metabolic Program Promotes Anticipation of Environmental Shifts. *PLoS Biol* **13**,  
765 e1002042 (2015).

- 766 21. New, A. M. *et al.* Different Levels of Catabolite Repression Optimize Growth in  
767 Stable and Variable Environments. *PLoS Biol* **12**, e1001764 (2014).
- 768 22. Wang, J. *et al.* Natural Variation in Preparation for Nutrient Depletion Reveals a  
769 Cost–Benefit Tradeoff. *PLoS Biol* **13**, e1002041 (2015).
- 770 23. Jiang, F., Frey, B. R., Evans, M. L., Friel, J. C. & Hopper, J. E. Gene Activation by  
771 Dissociation of an Inhibitor from a Transcriptional Activation Domain. *Mol. Cell. Biol.* **29**,  
772 5604–5610 (2009).
- 773 24. Egriboz, O., Jiang, F. & Hopper, J. E. Rapid GAL Gene Switch of *Saccharomyces*  
774 *cerevisiae* Depends on Nuclear Gal3, Not Nucleocytoplasmic Trafficking of Gal3 and Gal80.  
775 *Genetics* **189**, 825–836 (2011).
- 776 25. Stockwell, S. R. & Rifkin, S. A. A living vector field reveals constraints on galactose  
777 network induction in yeast. *Mol. Syst. Biol.* **13**, 908 (2017).
- 778 26. Liti, G. *et al.* Population genomics of domestic and wild yeasts. *Nature* **458**, 337–41  
779 (2009).
- 780 27. Mateus, C. & Avery, S. V. Destabilized green fluorescent protein for monitoring  
781 dynamic changes in yeast gene expression with flow cytometry. *Yeast* **16**, 1313–23 (2000).
- 782 28. Chuffart, F. *et al.* Exploiting Single-Cell Quantitative Data to Map Genetic Variants  
783 Having Probabilistic Effects. *PLoS Genet.* **12**, e1006213 (2016).
- 784 29. Hittinger, C. T. & Carroll, S. B. Gene duplication and the adaptive evolution of a  
785 classic genetic switch. *Nature* **449**, 677–681 (2007).
- 786 30. Peng, G. & Hopper, J. E. Gene activation by interaction of an inhibitor with a  
787 cytoplasmic signaling protein. *Proc. Natl. Acad. Sci.* **99**, 8548–8553 (2002).
- 788 31. Pilauri, V., Bewley, M., Diep, C. & Hopper, J. Gal80 Dimerization and the Yeast  
789 GAL Gene Switch. *Genetics* **169**, 1903–1914 (2005).
- 790 32. Lavy, T., Kumar, P. R., He, H. & Joshua-Tor, L. The Gal3p transducer of the GAL  
791 regulon interacts with the Gal80p repressor in its ligand-induced closed conformation. *Genes*  
792 *Dev.* **26**, 294–303 (2012).
- 793 33. Gillespie, D. T. Exact stochastic simulation of coupled chemical reactions. *J. Phys.*  
794 *Chem.* **81**, 2340–2361 (1977).
- 795 34. Escalante-Chong, R. *et al.* Galactose metabolic genes in yeast respond to a ratio of  
796 galactose and glucose. *Proc. Natl. Acad. Sci.* **112**, 1636–1641 (2015).
- 797 35. Cherry, J. M. *et al.* *Saccharomyces* Genome Database: the genomics resource of  
798 budding yeast. *Nucleic Acids Res.* **40**, D700–D705 (2012).
- 799 36. Thoden, J. B., Ryan, L. A., Reece, R. J. & Holden, H. M. The Interaction between an  
800 Acidic Transcriptional Activator and Its Inhibitor THE MOLECULAR BASIS OF Gal4p  
801 RECOGNITION BY Gal80p. *J. Biol. Chem.* **283**, 30266–30272 (2008).
- 802 37. Yvert, G. *et al.* Trans-acting regulatory variation in *Saccharomyces cerevisiae* and the  
803 role of transcription factors. *Nat Genet* **35**, 57–64 (2003).
- 804 38. Kwan, E. X., Foss, E., Kruglyak, L. & Bedalov, A. Natural Polymorphism in BUL2  
805 Links Cellular Amino Acid Availability with Chronological Aging and Telomere  
806 Maintenance in Yeast. *PLoS Genet* **7**, e1002250 (2011).
- 807 39. Fehrmann, S. *et al.* Natural sequence variants of yeast environmental sensors confer  
808 cell-to-cell expression variability. *Mol. Syst. Biol.* **9**, 695 (2013).
- 809 40. Kron, S. J. Filamentous growth in budding yeast. *Trends Microbiol.* **5**, 450–454  
810 (1997).
- 811 41. Gaisne, M., Bécam, A. M., Verdière, J. & Herbert, C. J. A ‘natural’ mutation in  
812 *Saccharomyces cerevisiae* strains derived from S288c affects the complex regulatory gene  
813 HAP1 (CYP1). *Curr. Genet.* **36**, 195–200 (1999).
- 814 42. Gerke, J., Lorenz, K., Ramnarine, S. & Cohen, B. Gene-environment interactions at  
815 nucleotide resolution. *PLoS Genet* **6**, (2010).

- 816 43. Llamosi, A. *et al.* What Population Reveals about Individual Cell Identity: Single-Cell  
817 Parameter Estimation of Models of Gene Expression in Yeast. *PLOS Comput Biol* **12**,  
818 e1004706 (2016).
- 819 44. Zhao, L., Sun, T., Pei, J. & Ouyang, Q. Mutation-induced protein interaction kinetics  
820 changes affect apoptotic network dynamic properties and facilitate oncogenesis. *Proc. Natl.*  
821 *Acad. Sci.* **112**, E4046–E4054 (2015).
- 822 45. Nijhout, H. F., Best, J. A. & Reed, M. C. Using mathematical models to understand  
823 metabolism, genes, and disease. *BMC Biol.* **13**, 79 (2015).
- 824 46. Louis, E. & Durbin, R. The Saccharomyces Genome Resequencing Project;  
825 <http://www.sanger.ac.uk/Teams/Team71/durbin/sgrp/>. (2007).
- 826 47. Argueso, J. L. *et al.* Genome structure of a Saccharomyces cerevisiae strain widely  
827 used in bioethanol production. *Genome Res* **19**, 2258–70 (2009).
- 828 48. Hahne, F. *et al.* flowCore: a Bioconductor package for high throughput flow  
829 cytometry. *BMC Bioinformatics* **10**, 106 (2009).
- 830

831

832

### 833 ACKNOWLEDGEMENTS

834

835 We thank Orsolya Symmons for discussions, Olivier Gandrillon for critical reading of  
836 the manuscript, Nicolas Rochette for sequence analysis, Audrey Barthelaix for initial tests on  
837 the robotic platform, Sandrine Mouradian and SFR Biosciences Gerland-Lyon Sud  
838 (UMS344/US8) for access to flow cytometers and technical assistance, the Pôle Scientifique  
839 de Modélisation Numérique and the CIMENT infrastructure (supported by the Rhône-Alpes  
840 region, Grant CPER07\_13 CIRA) for computing resources, BioSyL Federation and Ecofect  
841 Labex for inspiring scientific events, developers of R, bioconductor and Ubuntu for their  
842 software. This work was supported by the European Research Council under the European  
843 Union's Seventh Framework Programme FP7/2007-2013 Grant Agreement n°281359. DJ  
844 acknowledges program AGIR of University Grenoble-Alpes and the Institut Rhône-Alpin des  
845 Systèmes Complexes for funding. M. Spr. was supported by grants NSF 1349248 and RO1  
846 GM120122-01 from the National Science Foundation (USA).

847

848 AUTHORS CONTRIBUTION

849 Performed experiments: M.R., H.D-B., E.F., M.E., A.B.

850 Contributed analysis tools: M.R., F.C., D.J., and G.Y.

851 Contributed reagents: M.Spr.

852 Developed and evaluated pilot versions of the model: F.C. and F.P.

853 Conceived, implemented and used the model: D.J.

854 Performed molecular dynamics simulations: M.Spi.

855 Interpreted results: M.R., M.Spr., M.Spi., D.J. and G.Y.

856 Conceived and designed the study: G.Y.

857 Wrote the paper: M.R., D.J. and G.Y.

858

859

860

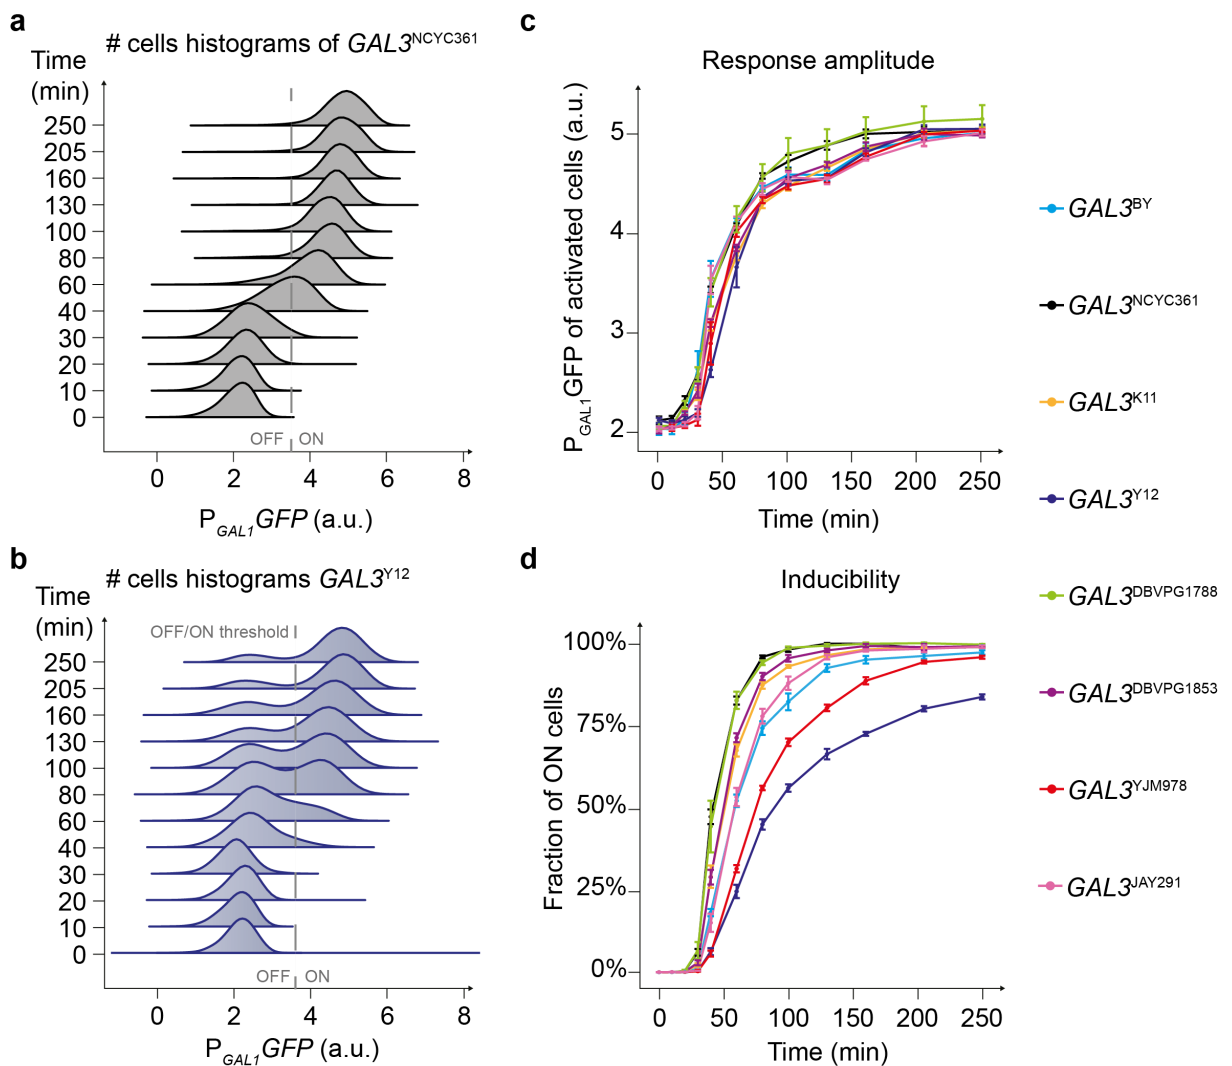

861

FIGURE 1

862

863 **Figure 1. Dynamic response to galactose in the context of  $GAL3$  variants.** Acquisitions  
 864 were made on strains where the  $GAL3$  allele was replaced by the indicated natural alleles.  
 865 These strains were otherwise isogenic, with a BY background. (a-b) Flow-cytometry data  
 866 obtained on strains harboring the  $GAL3^{NCYC361}$  allele (a) or the  $GAL3^{Y12}$  allele (b). Cells were  
 867 cultured in raffinose 2% and induced at time 0 by adding galactose at a final concentration of  
 868 0.5%. a. u., arbitrary units. Grey dashed line, threshold used to distinguish ON cells from OFF  
 869 cells. (c) Amplitude of the response (mean expression) as a function of time for each  $GAL3$   
 870 replacements strain. Error bars represent standard error of the mean (n=6). (d) Inducibility of  
 871 the response (fraction of ON cells) as a function of time for each  $GAL3$  replacement strain.  
 872 Error bars represent standard error of the mean (n=6).

873

874

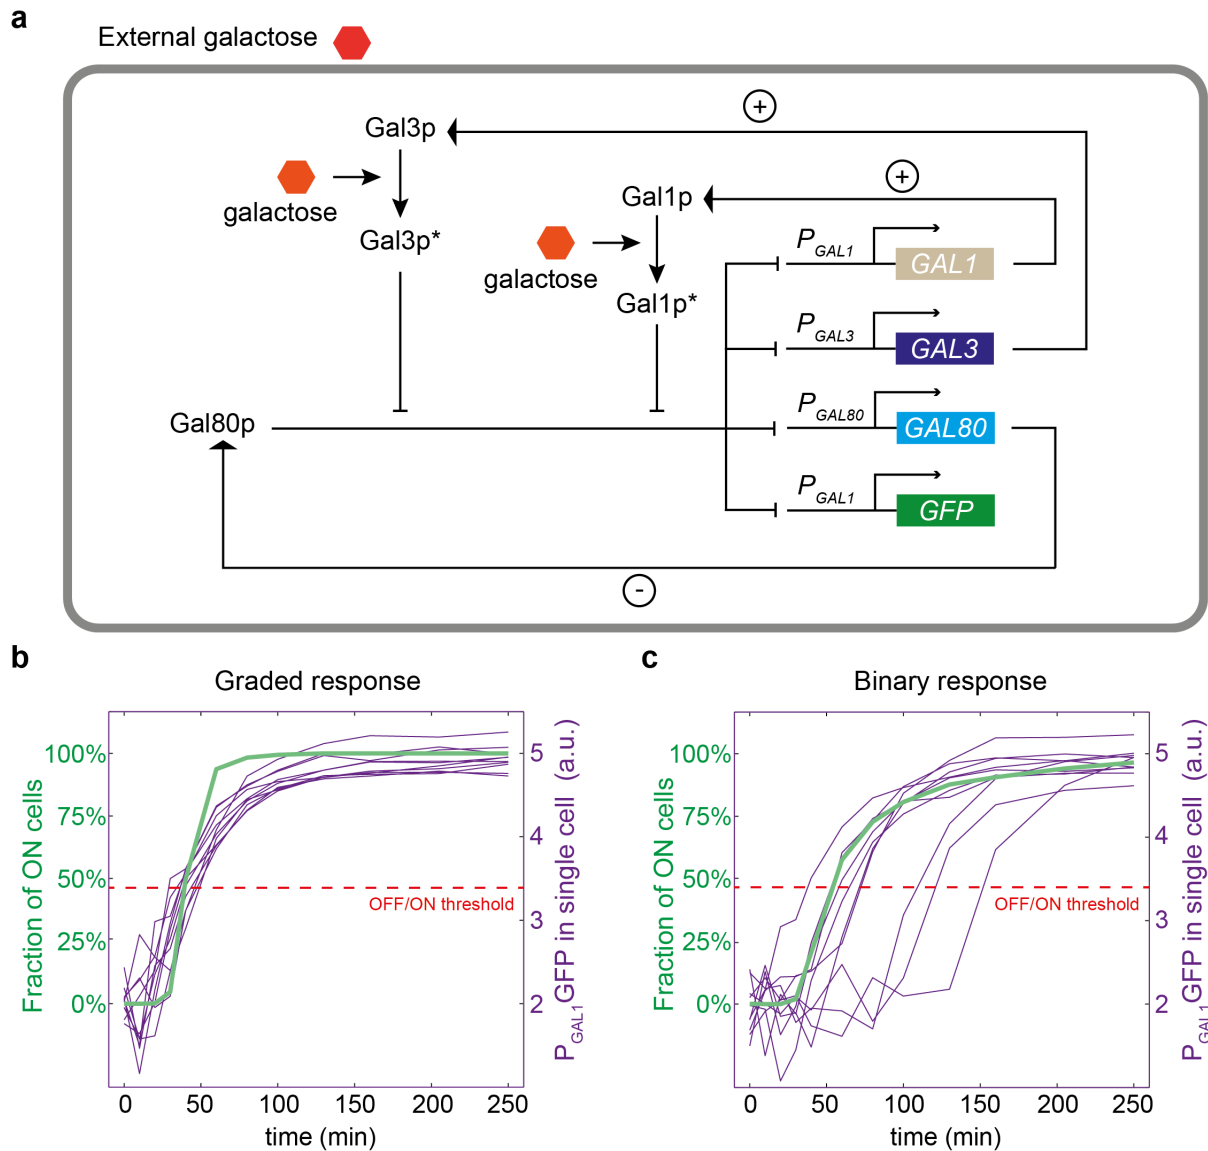

FIGURE 2

875  
876  
877  
878  
879  
880  
881  
882  
883  
884  
885  
886  
887  
888  
889  
890  
891

**Figure 2. *In-silico* model of network induction.** (a) Schematic representation of the model used. Galactose-activated Gal1p and Gal3p proteins become Gal1p\* and Gal3p\*, respectively. Pointed and blunt arrows represent activation and inhibition, respectively. Positive and negative feedback loops are highlighted by + and - signs. (b) Example of a gradual response predicted by the model ( $[gal]=0.5\%$ ,  $\rho_{Gal3}=140$  and  $K_{Gal}=0.055$ ). Thin violet lines represent stochastic simulations of network activation in individual cells. Dashed red line represents the threshold distinguishing ON from OFF cells. Green thick line indicates the fraction of ON cells as a function time. (c) Example of a binary response predicted by the model ( $[gal]=0.5\%$ ,  $\rho_{Gal3}=40$  and  $K_{Gal}=0.055$ ). Same color code as in (b).

892  
893

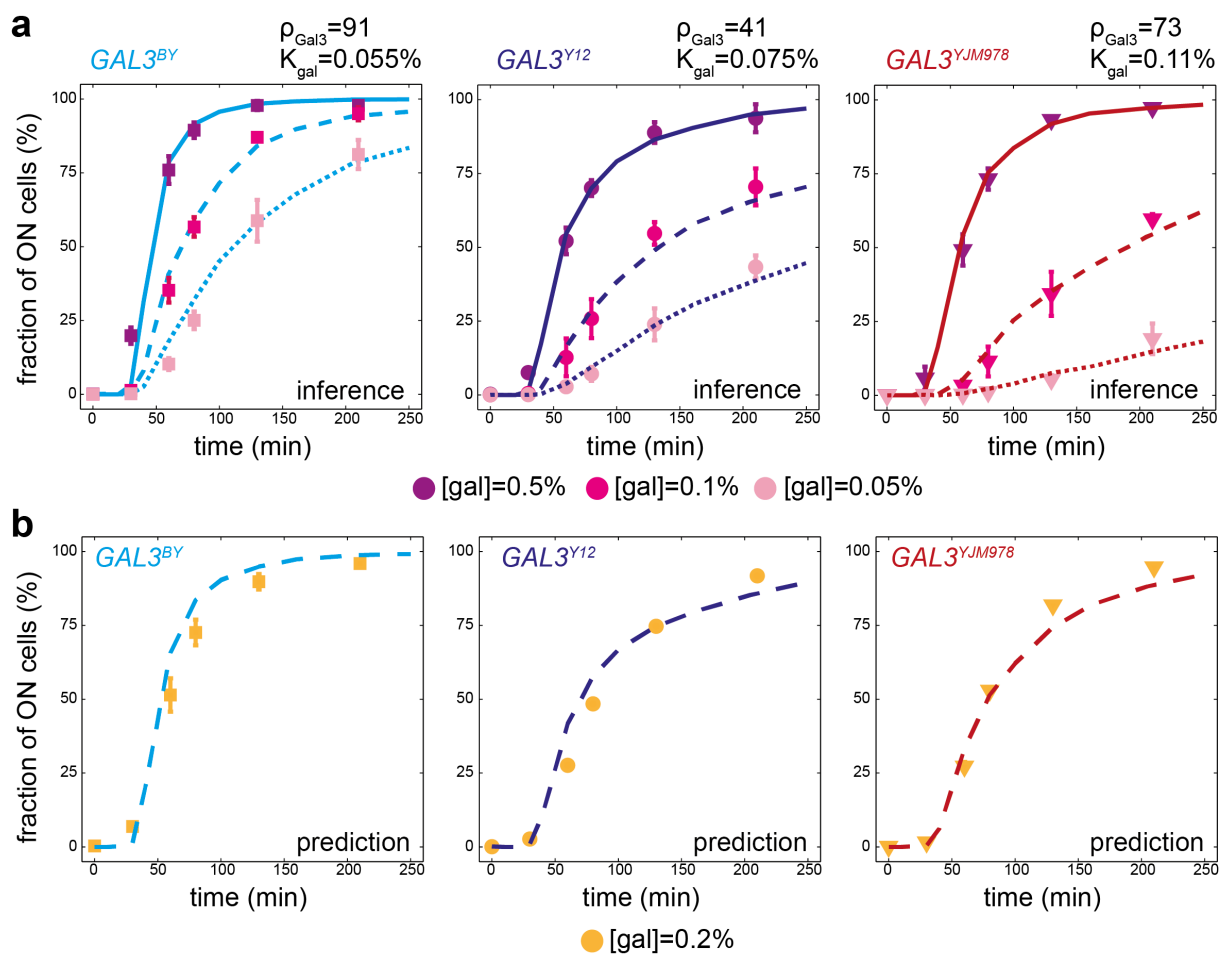

FIGURE 3

894  
895  
896  
897  
898  
899  
900  
901  
902  
903  
904  
905  
906  
907  
908  
909  
910

**Figure 3. Strain-specific training of the model and validation.**(a) Model fitting. Each panel corresponds to one strain carrying the indicated *GAL3* allele. Inducibility was measured by flow cytometry (data points +/- s.e.m.) after stimulating cells with three different concentrations of galactose (points colored according to the concentration). For each strain, this data was used to fit the *GAL3*-dependent parameters  $\rho_{Gal3}$  and  $K_{Gal}$ . Inferred parameter values are shown. Lines in plain (resp. dashed and dotted) represent the inducibility predicted by the model at [gal]=0.5% (resp. 0.1% and 0.05%). (b) With the parameters inferred in (a) we use the model to predict the inducibility of each strain at a galactose concentration of 0.2% (lines), and this prediction was compared to experimental measures (dots +/- s.e.m.).

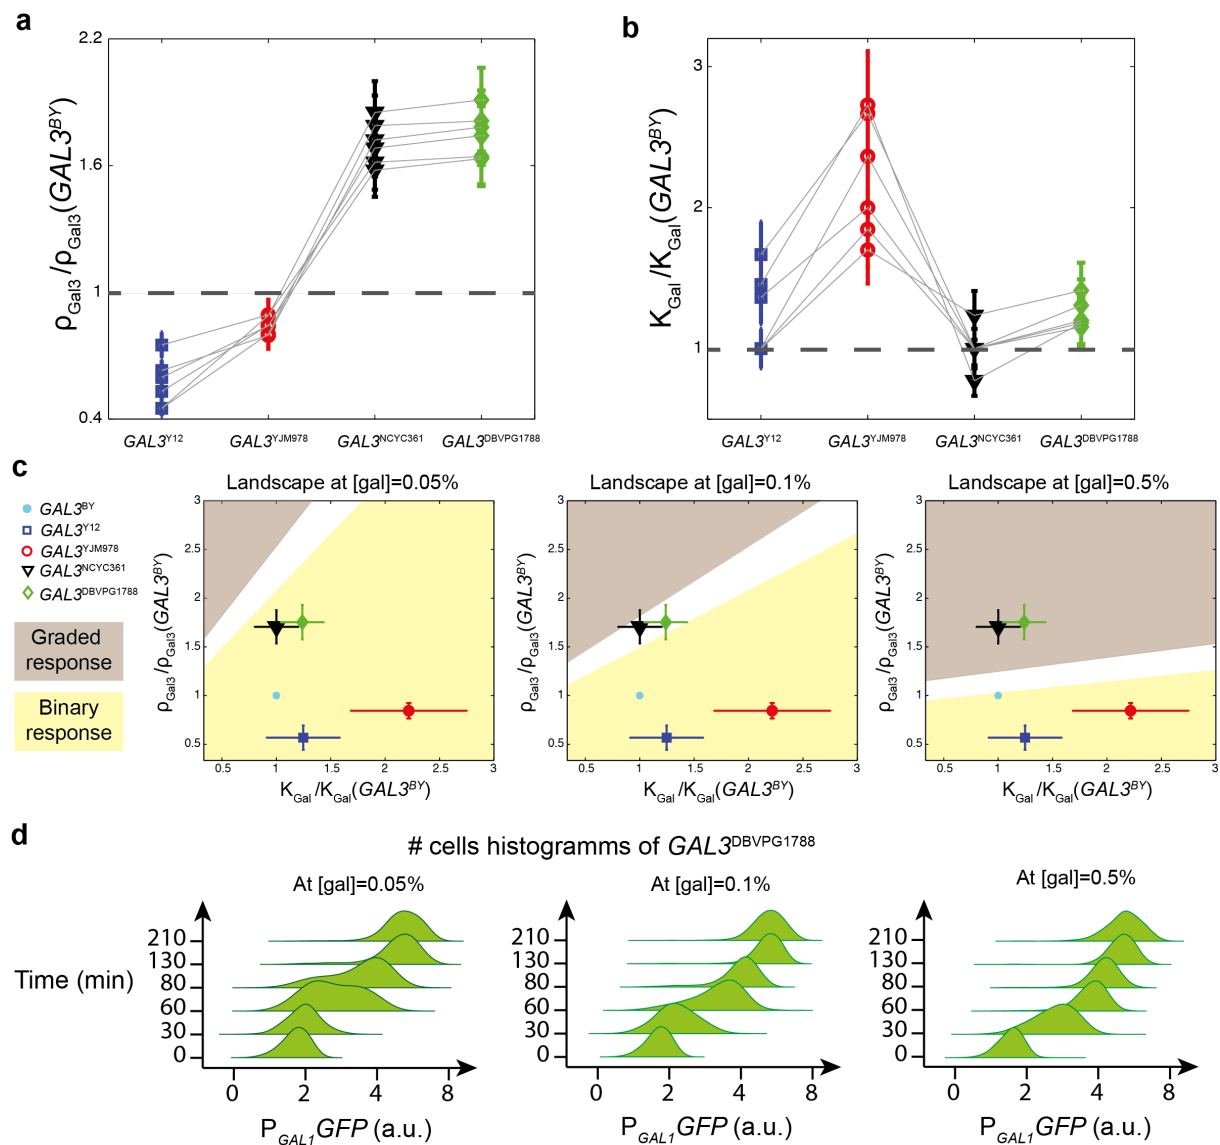

FIGURE 4

911  
 912  
 913  
 914 **Figure 4. *GAL3* alleles map to distinct locations of the parameter space. (a-b)** Parameter  
 915 values obtained by fitting the model to experimental data collected on five strains at three  
 916 concentrations of the inducer ([gal] = 0.05, 0.1 and 0.5%). Six independent fits were  
 917 performed (one per grey line). For each one, different values of *GAL3*-independent  
 918 parameters were chosen (see Supplementary Text 1), and parameters  $\rho_{Gal3}$  (**a**) and  $K_{Gal}$  (**b**)  
 919 were estimated for each strain. Dots represent their value for the indicated strain, relative to  
 920 the value estimated for the  $GAL3^{BY}$  strain. Error bars: uncertainty on parameter estimation for  
 921 each inference (see Materials and Methods). (**c**) Phenotypic landscape predicted by the model.  
 922 At defined concentrations of the inducer ([gal]), the values of  $\rho_{Gal3}$  and  $K_{Gal}$  determine  
 923 whether the response is gradual (brown) or binary (yellow). The white zone is an intermediate  
 924 region where the distinction between gradual and binary is unclear. Using parameters inferred  
 925 in (**a**) and (**b**), alleles are mapped to the landscape (colored dots). Error bars: standard  
 926 deviation of the 6 distinct estimations. (**d**) Time-course flow cytometry data of the  
 927  $GAL3^{DBVPG1788}$  strain, showing its transient binary response at low concentration of inducer  
 928 (left) and its gradual response at higher concentration (right).



929

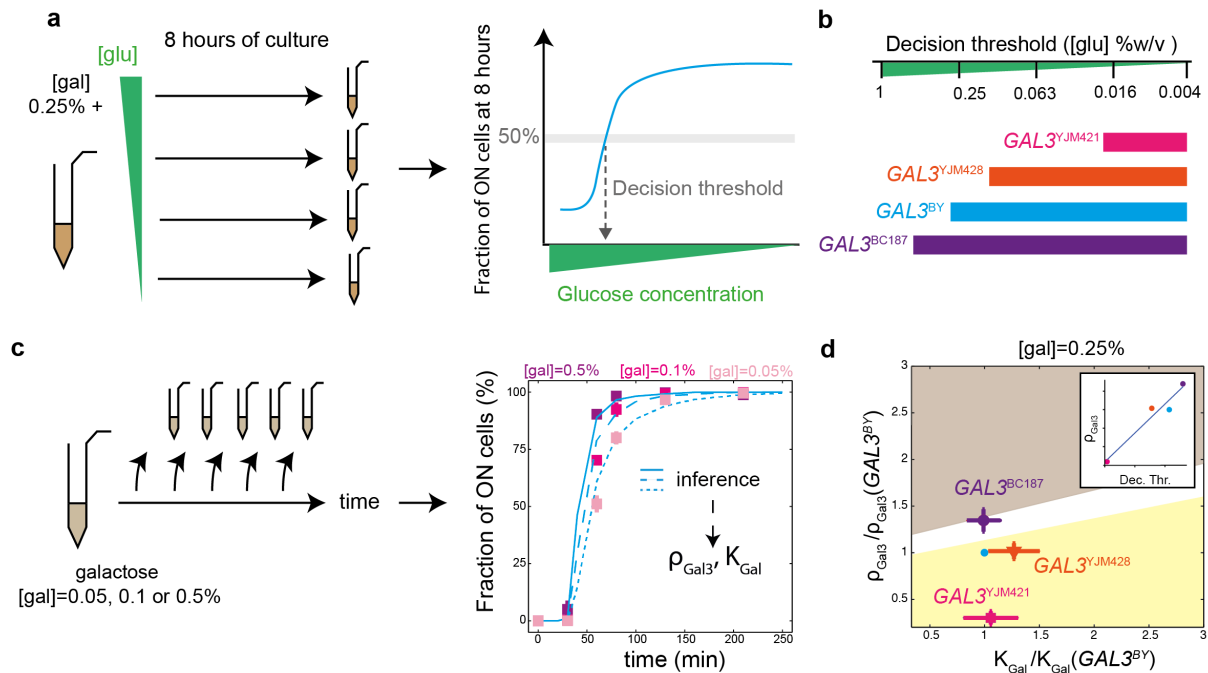

FIGURE 5

930  
931  
932  
933  
934  
935  
936  
937  
938  
939  
940  
941  
942  
943  
944

**Figure 5. Relationship between inducibility and diauxic shift decision threshold.** (a) Schematic representation of decision threshold measurement. The decision threshold corresponds to the concentration of glucose at which 50% of the cells are induced in the presence of 0.25% galactose. The blue curve is theoretical and shown to explain how the fraction of ON cells depends on glucose concentration. (b) Decision thresholds for strains  $GAL3^{BY}$ ,  $GAL3^{YJM421}$ ,  $GAL3^{YJM428}$  and  $GAL3^{BC187}$  at [gal] = 0.25%. (c) Schematic representation of  $GAL3$  induction parameters determination. (d) Location of the  $GAL3$  replacement strains in the phenotypic landscape of the model at [gal] = 0.25%. Inset:  $\rho_{Gal3}$  values as a function of the decision threshold, with dots corresponding to strains.

945

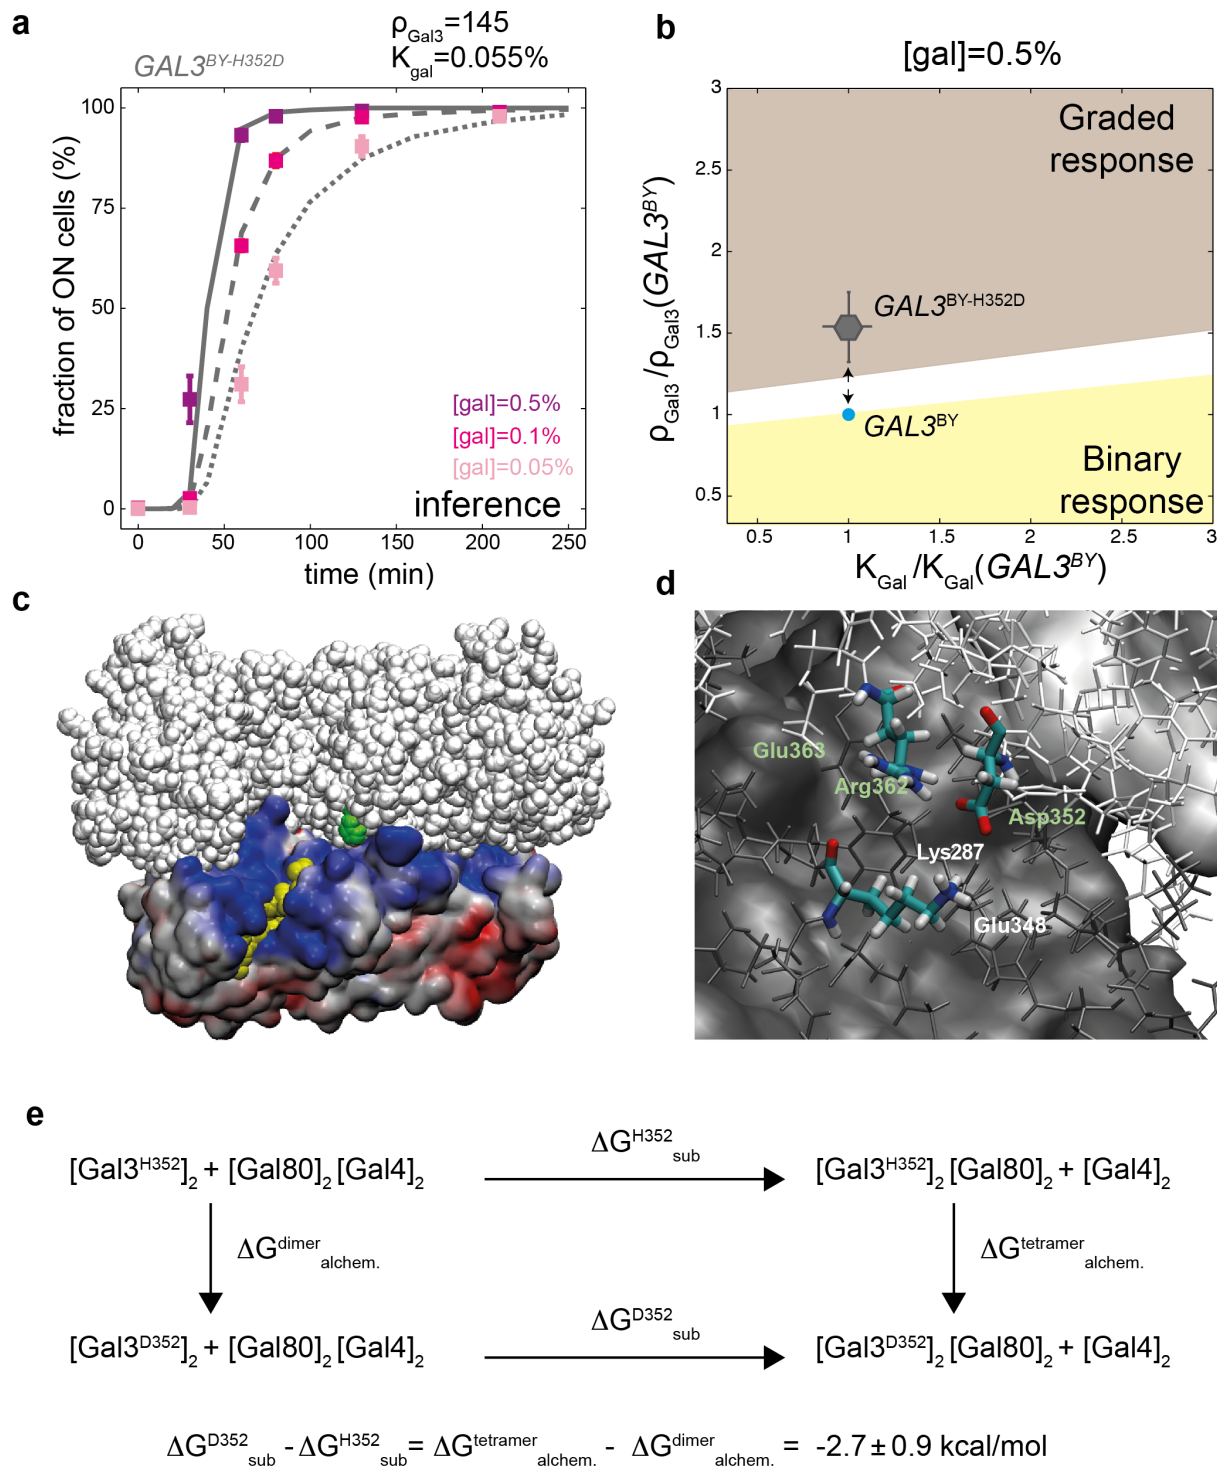

946

947

948

949

950

951

952

953

FIGURE 6

**Figure 6. Functional inference of the H352D variant of *GAL3*.** (a). Experimental acquisitions (dots) and model fitting (curves) of the induction dynamics of the *GAL3<sup>BY-H352D</sup>* strain. (b) *GAL3<sup>BY</sup>* (blue dot) and *GAL3<sup>BY-H352D</sup>* (grey dot with standard deviation bars) strains localisation in the phenotypic landscape of the model at [gal]=0.5%. Arrows: phenotypic trajectory between the two alleles. (c) Structure of the tetrameric complex

954 [Gal3p\*]<sub>2</sub>[Gal80p]<sub>2</sub> (PDB entry 3V2U). Residue His352 of one Gal3p unit is in the back side  
955 and not visible. The His352 residue of the other Gal3p unit is shown as green beads in the  
956 center; it is located at the binding interface of the Gal3p\* dimer (white beads) and the Gal80p  
957 dimer (colored surface). Gal80p residues are colored according to their electrostatic surface  
958 potential from red ( $\leq -10$  kT/e) to blue ( $\geq +10$  kT/e). Yellow beads: the acidic activation  
959 domain of Gal4p was inserted in the complex by superimposition with crystal structure 3BTS.  
960 A similar insertion in the other Gal80p unit is in the back side and not visible. Created with  
961 VMD software. (d) Local stabilization of Gal3p-Asp352 by residues Gal3p-Arg362 and  
962 Gal80p-Lys287 in the [Gal3]<sub>2</sub>[Gal80]<sub>2</sub> complex. Green and white labels refer to residues from  
963 Gal3p and Gal80p units, respectively. The figure shows a snapshot from a molecular  
964 dynamics simulation of the mutation H352D carried out for a model system of the complex  
965 (see Supplementary Text 2). Atoms within 15 Å of residue 352 are shown as thin sticks in  
966 white (Gal3p) or dark grey (Gal80p). Remaining atoms are shown as a solid surface. Created  
967 with VMD software. (e) Thermodynamic cycle quantifying the energetic impact of the  
968 H352D mutation on the substitution of [Gal4p]<sub>2</sub> by [Gal3p]<sub>2</sub> as binding partner of [Gal80p]<sub>2</sub>  
969 ( $\Delta G_{sub}$ , horizontal arrows). This impact is measured as  $\Delta \Delta G = \Delta G_{sub}^{D352} - \Delta G_{sub}^{H352}$ , which  
970 equals to  $\Delta G_{alchem}^{tetramer} - \Delta G_{alchem}^{dimer}$  (vertical arrows) because free enthalpy is a state  
971 function. These latter quantities correspond to the free enthalpy change for the alchemical  
972 (double) mutation of His>Asp in the Gal3p-Gal80p tetramer and in the Gal3p dimer,  
973 respectively, which were computed by alchemical free energy calculations (see  
974 Supplementary Text 2).  
975  
976  
977

978 **Supplementary Figure 1. Sequences of natural *GAL3* locus used in this study. (a)**  
979 Nucleotidic sequences of *GAL3* promoters. **(b)** Amino-acid sequences of Gal3p proteins.  
980 Alignment was performed using T-Coffee and visualized using Boxshade.

981  
982 **Supplementary Figure 2. The lagging time in binary system depends on the initial**  
983 **activation force.**

984 For the same parameters as in Fig.2c, from each single-cell trajectory, we estimate the lagging  
985 time before single-cell reaches the threshold distinguishing ON from OFF cells (dashed line  
986 in Fig.2c). For 1000 simulated trajectories, we plot it as a function of the initial activation  
987 force defined as the value of the OFF to ON switching rate of GAL promoters  $k_i^{on}$  just at the  
988 moment of induction. This parameter depends on the initial number of Gal1p and Gal3p and  
989 on the effective constants  $K_1$  and  $K_3$  (see Materials and Methods and Supplementary Text 1).  
990 The Spearman correlation between lagging time and initial activation force is -0.75.

991  
992 **Supplementary Figure 3. Effect of  $\rho_{Gal1}$ ,  $\rho_{Gal3}$  and  $\rho_{Gal80}$  values on network inducibility.**  
993 Each panel shows the induction of the network as a function of time for different values of  
994  $\rho_{Gal3}$  (colored lines) in a specific context of  $\rho_{Gal1}$  and  $\rho_{Gal80}$  values. Galactose concentration  
995 and  $K_{gal}$  were fixed to  $[gal] = 0.5\%$  and  $K_{gal} = 0.055\%$ .

996  
997 **Supplementary Figure 4. Inducibility predictions depend on  $\rho_{Gal1}$ ,  $\rho_{Gal3}$  and  $\rho_{Gal80}$  meta-**  
998 **parameters rather than on their constituent parameters.** Each panel represents model  
999 predictions of inducibility as a function of time after induction at the indicated galactose  
1000 concentration. Colors correspond to different sets of parameter values in the model, blue  
1001 (reference) referring to values of Table S1 completed with  $K_1=0.35$ ,  $K_3=1.26$ ,  $K_{80}=1.03$  and  
1002  $K_{gal}=0.055\%$ . **(a)** Parameters constituting  $\rho_{Gal1}$  (formula  $\rho_{Gal1}=\alpha_1\gamma_1/(\beta_1\mu_1K_1)$ ) were changed in  
1003 a way that kept  $\rho_{Gal1}$  invariant. For example,  $K_1$  was divided by 2 and  $\beta_1$  was doubled (red).  
1004 **(b-c)** Same analysis but where constituents of  $\rho_{Gal3}$  (b) or  $\rho_{Gal80}$  (c) were changed (similar  
1005 formula). **(d)** Same analysis as in b but at lower galactose concentration. All simulations were  
1006 run with  $\rho_{Gal1}=100$ ,  $\rho_{Gal3}=100$  and  $\rho_{Gal80}=250$ .

1007  
1008 **Supplementary Figure 5. The network behaviour depends on galactose concentration**  
1009 **and on two model parameters.** Predictions of the model for the inducibility as a function of  
1010 time at 5 different galactose concentrations for different values of the GAL3-dependent  
1011 parameters  $\rho_{Gal3}$  and  $K_{Gal}$ . GAL3-independent parameters were fixed (Table S1) with  
1012  $\rho_{Gal1}=100$  and  $\rho_{Gal80}=250$  (see main text and Supplementary Text 1 for parameter definitions).

1013  
1014 **Supplementary Figure 6. Inference of GAL3-dependent model parameters for**  
1015 ***GAL3*<sup>NCYC361</sup> and *GAL3*<sup>DBVPG1788</sup>.** Experimentally-measured inducibility of *GAL3*<sup>NCYC361</sup> and  
1016 *GAL3*<sup>DBVPG1788</sup> strains, as a function of time, at 3 different galactose concentrations (symbols  
1017 coloured according to the concentration). These data were used to fit the GAL3-dependent  
1018 parameters  $\rho_{Gal3}$  and  $K_{Gal}$ . Full lines (resp. dashed and dotted lines) represent the behaviours  
1019 predicted by the model at  $[gal]=0.5\%$  (resp. 0.1% and 0.05%).

1020  
1021 **Supplementary Figure 7. Inference of GAL3-dependent model parameters for alleles**  
1022 **tested in diauxic shift experiments.** Experimentally-measured inducibility of *GAL3*<sup>BY</sup>,  
1023 *GAL3*<sup>YJM421</sup>, *GAL3*<sup>YJM428</sup> and *GAL3*<sup>BC187</sup> strains, as a function of time, at 3 different galactose  
1024 concentrations (symbols coloured according to the concentration). These data were used to fit  
1025 the GAL3-dependent parameters  $\rho_{Gal3}$  and  $K_{Gal}$ . Full lines (resp. dashed and dotted lines)  
1026 represent the behaviours predicted by the model at  $[gal]=0.5\%$  (resp. 0.1% and 0.05%).

1027

1028 **Supplementary Figure 8. Alchemical free energy calculations.** **A)** Model system for the  
1029 Gal3p\*-Gal80p tetramer used for the alchemical free energy calculations. Residue 352 (of  
1030 Gal3p\*) in the center is shown in colored beads (only one of two possible residues is seen in  
1031 the chosen orientation). Residues within 15 Å of the two residues 352 were allowed to move  
1032 freely; they are shown as thin sticks in white (Gal3p\*) or grey (Gal80p). Residues that were  
1033 harmonically restrained are shown as solid surface. This protein substructure was solvated in  
1034 a cubic box (side length = 90 Å) of water molecules (transparent blueish cube) and salt (blue  
1035 and yellow dots) with an ionic strength of 0.15 M. **B)** Block analysis of the alchemical free  
1036 energy calculations.  $\Delta G_{\text{alchemical}}$  corresponds to the free energy change for transforming 2 x  
1037 Gal3p\*-Asp352 to 2 x Gal3p\*-His352. (*i.e.*, changing the coupling parameter  $\lambda$  from 1 to 0,  
1038 see Supplementary Text 2).  $\Delta G_{\text{alchemical}}$  for the Gal3p\* dimer (grey squares) and the Gal3p\*-  
1039 Gal80p tetramer (black circles) is plotted for consecutive blocks of 100 ps of sampling. The  
1040 horizontal dashed lines indicate the mean values.

1041

1042

1043 **Table S1. Description and values of model parameters used in this study (in**  
1044 **Supplementary Text 1)**

1045

1046 **Table S2. Growth rates of *GAL3* allele-replacement strains (in Supplementary Text 1)**

1047

1048 **Table S3. Strains used in this study.**

1049

1050 **Supplementary Text 1. Model description and analysis**

1051

1052 **Supplementary Text 2. Methods for molecular dynamics simulations**

1053

1054
